1  
2  
3  
4  
5  
6  
7  
8  
9  
10  
11  
12  
13  
14  
15  
16  
17  
18  
19  
20  
21  
22  
23  
24  
25  
26  
27  
28  
29  
30  
31  
32  
33  
34  
35  
36  
37  
38  
39  
40  
41  
42  
43  
44  
45  
46  
47  
48  
49  
50  
51

Title: S1PR3 mediates itch and pain via distinct TRP channel-dependent pathways

Running title: S1PR3 mediates itch and pain

Authors and affiliations: Rose Z. Hill<sup>1</sup>, Takeshi Morita<sup>1#</sup>, Rachel B. Brem<sup>2,3</sup>, Diana M. Bautista<sup>1,4\*</sup>

1. Department of Molecular and Cell Biology, University of California, Berkeley, CA 94720, USA.
2. Department of Plant and Microbial Biology, University of California, Berkeley, CA 94720, USA.
3. Buck Institute for Research on Aging, Novato, CA 94945, USA.
4. Helen Wills Neuroscience Institute, University of California, Berkeley, CA 94720, USA.

# Current Address: The Rockefeller University, New York, NY 10065, USA.

\* Correspondence should be addressed to Diana Bautista 142 Life Sciences Addition #355, Berkeley, CA, 94720; e: [dbautista@berkeley.edu](mailto:dbautista@berkeley.edu)

Number of pages: 28

Number of figures: 6

Number of tables: 0

Number of words:

Abstract: 163

Significance Statement: 75

Introduction: 582

Discussion: 1294

Declaration of interests: R.Z.H., T.M., R.B.B., and D.M.B. are co-inventors on a patent based upon several of the findings of this manuscript.

Acknowledgements: We would like to thank Z. Rifi for assistance with scoring mouse behavior, N. Kucirek for critical reading of the manuscript, and all members of the D.M.B laboratory for constructive feedback and criticism.

## 52 Abstract

53 Sphingosine 1-phosphate (S1P) is a bioactive signaling lipid associated with a variety of chronic pain and  
54 itch disorders. S1P signaling has been linked to cutaneous pain, but its role in itch has not yet been  
55 studied. Here we find that S1P triggers itch and pain in mice in a concentration-dependent manner, with  
56 low levels triggering acute itch alone, and high levels triggering both pain and itch. Calcium imaging and  
57 electrophysiological experiments revealed that S1P signals via S1PR3 and TRPA1 in a subset of  
58 pruriceptors, and via S1PR3 and TRPV1 in a subset of heat nociceptors. And in behavioral assays, S1P-  
59 evoked itch was selectively lost in mice lacking TRPA1, whereas S1P-evoked acute pain and heat  
60 hypersensitivity were selectively lost in mice lacking TRPV1. We conclude that S1P acts via different  
61 cellular and molecular mechanisms to trigger itch and pain. Our discovery elucidates the diverse roles that  
62 S1P signaling plays in somatosensation and provides insight into how itch and pain are discriminated in the  
63 periphery.

64

## 65 Significance Statement

66 Itch and pain are major health problems with few effective treatments. Here, we show that the pro-  
67 inflammatory lipid S1P and its receptor S1PR3 trigger itch and pain behaviors via distinct molecular and  
68 cellular mechanisms. Our results provide a detailed understanding of the roles that S1P and S1PR3 play in  
69 somatosensation, highlighting their potential as targets for analgesics and antipruritics, and provide new  
70 insight into the mechanistic underpinnings of itch versus pain discrimination in the periphery.

71

## 72 Introduction

73 Sphingosine 1-phosphate (S1P) is a bioactive sphingolipid associated with a variety skin disorders,  
74 including psoriasis (Checa et al., 2015; Myśliwiec et al., 2016), atopic and allergic contact dermatitis  
75 (Kohno et al., 2004; Sugita et al., 2010), and scleroderma (Castelino and Varga, 2014), as well as  
76 neuropathic pain (Patti et al., 2008; Janes et al., 2014), and other inflammatory diseases (Rivera et al.,  
77 2008; Chiba et al., 2010; Trankner et al., 2014; Donoviel et al., 2015; Roviezzo et al., 2015). S1P signaling  
78 via S1P Receptor 1 (S1PR1) facilitates the migration, recruitment, and activation of immune cells

79 (Matloubian et al., 2004; Cyster and Schwab, 2012), and S1P is also thought to influence epithelial cell  
80 differentiation and cell division via the action of several other S1PRs (Schüppel et al., 2008; Japtok et al.,  
81 2014). Intriguingly, expression of both S1PR1 and S1PR3 has been reported in the somatosensory ganglia  
82 (Camprubi-Robles et al., 2013; Usoskin et al., 2015), and S1P modulates sensory neuronal excitability  
83 (Zhang et al., 2006a, 2006b; Mair et al., 2011; Camprubi-Robles et al., 2013; Li et al., 2015; Wang et al.,  
84 2017), and has been implicated in pain and pain hypersensitivity (Mair et al., 2011; Camprubi-Robles et al.,  
85 2013; Finley et al., 2013; Hou and Fang, 2015; Weth et al., 2015; Hill et al., 2018). We and others have  
86 recently shown an important role for S1P signaling via S1P Receptor 3 in cutaneous pain sensation in  
87 rodents (Camprubi-Robles et al., 2013; Hill et al., 2018); however, the downstream mechanisms by which  
88 S1PR3 triggers neuronal excitation and pain are unclear. Likewise, it is not known whether S1P also acts  
89 as a pruritogen to cause itch.

90

91 S1P has been examined in a variety of inflammatory skin diseases and disease models. There is evidence  
92 supporting both protective and pathogenic effects of S1P signaling in mouse and human chronic itch and  
93 inflammatory diseases. In humans, elevated serum S1P is correlated with disease severity in both  
94 psoriasis and systemic sclerosis (Castelino and Varga, 2014; Checa et al., 2015; Thieme et al., 2017).  
95 Furthermore, ponesimod, an S1PR modulator and blocker of S1P signaling, appears to be promising for  
96 psoriasis treatment in humans (Brossard et al., 2013; Vaclavkova et al., 2014; Krause et al., 2017). In  
97 contrast, in the imiquimod mouse model of psoriasis, it was observed that topical S1P exerts protective  
98 effects (Schaper et al., 2013), and in dogs with atopic dermatitis, it was found that S1P levels are  
99 decreased in lesional skin (Bäumer et al., 2011). However, in the Nc/Nga mouse model of dermatitis and  
100 the TNCB mouse model of dermatitis, the S1P Receptor modulator fingolimod, which downregulates  
101 activity of S1PRs 1, 3,4, and 5, was found to exert protective effects (Kohno et al., 2004; Sugita et al.,  
102 2010). In light of these studies, we asked whether S1P can act as an acute pruritogen in mice.

103

104 We set out to answer this question by examining the role of S1P in acute itch, and by dissecting the  
105 downstream molecular mechanisms in somatosensory neurons responsible for S1P-evoked behaviors and  
106 neuronal activation. Here we show that S1P can act as both a pruritogen and algogen. Our study is the first

107 to identify a role for S1P signaling in acute itch, and to elucidate the downstream molecular mechanisms by  
108 which nociceptive and pruriceptive somatosensory neurons detect and respond to S1P. Our findings  
109 demonstrate the contribution of S1P signaling to cutaneous itch and pain, and have important applications  
110 for the design and use of S1PR modulators as therapeutics for chronic itch and pain diseases.

111

## 112 Materials and Methods

### 113 Mice

114 *S1pr3<sup>mcherry/+</sup>* (Sanna et al., 2016) and *S1pr3<sup>-/-</sup>* (Kono et al., 2004) mice were obtained from Jackson  
115 Laboratory and backcrossed to C57bl6/J, *Trpv1<sup>-/-</sup>* and *Trpa1<sup>-/-</sup>* mice were described previously (Caterina et  
116 al., 2000; Bautista et al., 2006a) and *Trpv1<sup>-/-</sup>/Trpa1<sup>-/-</sup>* mice were bred from crossing *Trpv1<sup>-/+</sup>* and *Trpa1<sup>-/+</sup>*  
117 mice. Mice (20–30 g; 8-10 weeks) were housed in 12 h light-dark cycle at 21°C. All experiments were  
118 performed under the policies and recommendations of the International Association for the Study of Pain  
119 and approved by the University of California, Berkeley Animal Care and Use Committee.

120

### 121 Correlation of gene expression with itch

122 A previous study examined the correlation of transcript expression of individual genes in dorsal root  
123 ganglion (DRG) neurons with itch behavior among BXD mouse strains (Morita et al., 2015). One of the top  
124 correlated genes from the screen was *Fam57b* ( $r = 0.57$ ), a recently identified ceramide synthase  
125 (Yamashita-Sugahara et al., 2013) and component of the S1P pathway that is robustly expressed in  
126 somatosensory neurons (Gerhold et al., 2013). To assess whether expression of the S1P pathway genes  
127 as a group was correlated with somatosensory behaviors across the mouse strains of the BXD population,  
128 we first tabulated the absolute value of the Pearson's correlation  $r$  between expression of each S1P  
129 pathway gene in turn (*Fam57b*, *Ppargc1a*, *Spns1*, *Spns2*, *Sphk2*, *S1pr3*, *S1pr1*, *Esrrb*, *Esrrg*, *Lrp2*) and  
130 itch behavior (Morita et al., 2015), and calculated the median of these correlation values,  $r_{true}$ . We then  
131 drew 10 random genes from the set of all 16,220 genes with detected expression and computed the  
132 median correlation as above using this null set,  $r_{null}$ . Repeating the latter 10,000 times established a null  
133 distribution of median correlations; we took the proportion of resampled gene groups that exhibited ( $r_{true} \geq$

134  $r_{null}$ ) as an empirical p-value reporting the significance of enriched correlation between expression and itch  
135 in the genes of the S1P pathway.

136

### 137 *Mouse behavior*

138 Itch and acute pain behavioral measurements were performed as previously described (Wilson et al.,  
139 2011). Mice were shaved one week prior to itch behavior. Compounds injected: 200 nM, 2  $\mu$ M, 10  $\mu$ M S1P  
140 (Tocris, Avanti Polar Lipids), in PBS with Methanol-PBS vehicle controls. Fresh S1P was resuspended in  
141 methanol and single-use aliquots were prepared and dried under nitrogen gas prior to use. Pruritogens  
142 were injected using both the neck/rostral back model (20  $\mu$ l), and the cheek model (20  $\mu$ l) of itch, as  
143 previously described (Wilson et al., 2011). Behavioral scoring was performed while blind to experimental  
144 condition and mouse genotype. All scratching and wiping behavior videos were recorded for 1 hour and  
145 scored for either the first 30 minutes (scratching) or the first five minutes (wiping). Bout number, time spent  
146 scratching, and bout length were recorded for scratching behavior. Wiping was recorded as number of  
147 wipes.

148

149 For radiant heat hypersensitivity behavior, S1P was injected intradermally into the plantar surface of the  
150 hindpaw (20  $\mu$ l). Radiant heat paw withdrawal latencies, before and after application of compound or  
151 vehicle were performed as previously described (Tsunozaki et al., 2013; Morita et al., 2015) using the  
152 Hargreaves test system (IITC Life Science). Mice were injected with compound of interest into the hind  
153 paw, paw withdrawal latencies were measured 15 min pre- and 20 min-30 min post-injection. Heat-evoked  
154 responses included fast paw withdrawal, licking/biting/shaking of the affected paw, or flinching. Mice were  
155 allowed to acclimate on platform for 1 hour before injection. The radiant heat source raised the platform  
156 temperature to 39.8 °C within 5 seconds, and to 60 °C within 10 seconds, as measured by a fast  
157 temperature probe (Physitemp).

158

159 Wherever possible, wild-type littermate controls were used in behavioral experiments. Mice were singly  
160 housed one week prior to all behavioral experiments. All mice were acclimated in behavioral chambers on  
161 the 2 subsequent days for at least 1 hour prior to treatment for itch/pain behavior and radiant heat. Age-  
162 matched or littermate male mice were used for all behavioral studies. Mice were tested in 4-part behavior

163 chambers (IITC Life Science) with opaque dividers (Tap Plastics). Itch and acute pain behavior was filmed  
164 from below using high-definition cameras.

165

### 166 *In situ hybridization (ISH)*

167 ISH was performed as previously described. Fresh DRG were dissected from 8-12 week old mice, flash  
168 frozen in OCT embedding medium, and sectioned at 14  $\mu\text{m}$  onto slides. ISH was performed using  
169 Affymetrix Quantigene ViewISH Tissue 2-plex kit according to manufacturer's instructions with Type 1 and  
170 Type 6 probes. The following probes against mouse mRNAs were created by Affymetrix and used for ISH:  
171 *S1pr3* and *Mrgpra3*. Slides were mounted in Fluoromount with No. 1.5 coverglass. Imaging of ISH  
172 experiments and all other live- and fixed-cell imaging was performed on an Olympus IX71 microscope with  
173 a Lambda LS-xl light source (Sutter Instruments). Images were analyzed using ImageJ software. Briefly,  
174 DAPI-positive cells were circled and their fluorescence intensity (AFU) for all channels was plotted against  
175 cell size using IgorPro software. Co-labeling analysis was performed using ImageJ. Intensity thresholds  
176 were set based on the negative control staining slide. Cells were defined as "co-expressors" if their  
177 maximum intensities were greater than the threshold for both the Type 1 and Type 6 probe channels.

178

### 179 *Cell culture*

180 Cell culture was carried out as previously described (Wilson et al., 2011). Briefly, neurons from dorsal root  
181 ganglia of 2-8 week old male and female mice, or trigeminal ganglia from P0-P4 neonates, where  
182 indicated, were dissected and incubated for 10 min in 1.4 mg ml<sup>-1</sup> Collagenase P (Roche) in Hanks  
183 calcium-free balanced salt solution, followed by incubation in 0.25% standard trypsin (vol/vol) -EDTA  
184 solution for 2 min with gentle agitation. Cells were then triturated in media (MEM Eagle's with Earle's BSS  
185 medium, supplemented with 10% horse serum (vol/vol), MEM vitamins, penicillin/streptomycin and L-  
186 glutamine), plated onto Poly D-Lysine (Sigma, 1 mg/mL) and Laminin (Corning, 1:300) coated glass  
187 coverslips and used within 20 h.

188

### 189 *Calcium imaging*

190 Ca<sup>2+</sup> imaging experiments were carried out as previously described (Wilson et al., 2011). DRG neurons  
191 from 2-8 week old male and female mice or P0-4 TG from mice of unknown sex were used for all

192 experiments. An age-matched wild-type control was also prepared and imaged the same day for  
193 experiments on knockout neurons. Cells were loaded for 60 min at room temperature with 10  $\mu$ M Fura-2AM  
194 supplemented with 0.01% Pluronic F-127 (wt/vol, Life Technologies) in a physiological Ringer's solution  
195 containing (in mM) 140 NaCl, 5 KCl, 10 HEPES, 2 CaCl<sub>2</sub>, 2 MgCl<sub>2</sub> and 10 D-(+)-glucose, pH 7.4. All  
196 compounds were purchased from Sigma. Acquired images were displayed as the ratio of 340 nm/380 nm.  
197 Cells were identified as neurons by eliciting depolarization with high potassium Ringer's solution (75 mM)  
198 at the end of each experiment. Responding neurons were defined as those having a > 15% increase from  
199 baseline ratio. Image analysis and statistics were performed using automated routines in Igor Pro  
200 (WaveMetrics). Fura-2 ratios were normalized to the baseline ratio  $F_{340}/F_{380} = (\text{Ratio})/(\text{Ratio } t = 0)$ .

201

### 202 *Electrophysiology*

203 Current clamp experiments were carried out as previously described (Hill et al., 2018). Briefly, gap-free  
204 current clamp recordings were collected at 5 kHz and filtered at 2 kHz (Axopatch 200B, pClamp software).  
205 Electrode resistance ranged between 2–5 M $\Omega$ . Internal solution contained 140 mM KCl, 2 mM MgCl<sub>2</sub>, 1  
206 mM EGTA, 5 mM HEPES, 1 mM Na<sub>2</sub>ATP, 100  $\mu$ M GTP, and 100  $\mu$ M cAMP (pH 7.4). Bath solution was  
207 physiological Ringer's solution. The pipette potential was canceled before seal formation. Experiments  
208 were carried out only on cells with a series resistance of less than 30 M $\Omega$  and membrane capacitance of <  
209 40 pF. Current injection was used to stabilize cells to  $\sim$  -60 mV prior to experiment. Action potentials which  
210 occurred +/- 1 sec of drug addition or a gravity perfusion artifact were not counted as responses to the  
211 drug. For experiments where two drugs were added in succession, an increase in spike frequency was  
212 considered a response for the second drug. For recordings from *S1pr3<sup>mCherry/+</sup>* animals, S1PR3+ DRG  
213 neurons were identified using a standard fluorescence microscope. Analysis of electrophysiology data was  
214 performed in pClamp and IgorPro. Experimenter was blinded to the antagonists applied until after data  
215 analysis was completed.

216

### 217 *Experimental design & statistical analyses*

218 All statistical tests were performed using Prism (GraphPad). Values are reported as the mean  $\pm$  SEM  
219 (where N = number of mice used) for calcium imaging experiments where multiple independent days of  
220 imaging were performed, and mean  $\pm$  SD for all other experiments (N = number of wells or number of

221 mice). A one- or two-way ANOVA followed by the Sidak's, Dunnett's or Tukey's post hoc tests (where  
222 appropriate) was employed. Number of mice or samples required to attain significance was not calculated  
223 beforehand and was based on numbers used in similar behavioral studies. For behavioral experiments,  
224 mice were randomly assigned to treatment groups by the individual who blinded the experimenter. For  
225 behavioral experiments, every effort was made to ensure equal numbers of mice of each genotype were  
226 used for each experiment (where appropriate), and that treated and control groups were of identical or  
227 near-identical size. Significance was labeled as: n.s., not significant,  $p \geq 0.05$ ; \* $p < 0.05$ ; \*\* $p < 0.01$ ; \*\*\* $p <$   
228 0.001.

229

## 230 Results

### 231 S1P triggers itch via S1PR3

232 Our group previously harnessed natural variation in somatosensory behaviors among genetically distinct  
233 mouse strains to identify candidate transducers in dorsal root ganglion (DRG) somatosensory neurons  
234 (Morita et al., 2015). Analysis of this dataset revealed that members of the sphingosine 1-phosphate (S1P)  
235 synthesis and signaling pathways (Fig. 1a) were expressed in somatosensory neurons in a manner that  
236 correlated with itch behaviors (Fig. 1b). Previous studies have shown that S1P promotes acute pain  
237 (Camprubi-Robles et al., 2013) and thermal sensitization via S1P Receptor 3 (S1PR3), and is required for  
238 normal mechanical pain sensitivity (Hill et al., 2018). Here, we sought to address the specific contribution of  
239 S1P/S1PR3 signaling to S1P-evoked itch behaviors.

240

241 We first asked whether exogenous S1P can trigger itch using the cheek assay, which allows for  
242 simultaneous discrimination of pain-evoked wiping and itch-evoked scratching in mice (Shimada and  
243 LaMotte, 2008). Injection of 2-10  $\mu\text{M}$  S1P triggered acute nocifensive behaviors, as previously shown  
244 (Camprubi-Robles et al., 2013; Hill et al., 2018). However, we also observed robust scratching in these  
245 animals (Fig. 1c). Intriguingly, 200 nM S1P elicited robust scratching behaviors (Fig. 1c), but no pain  
246 behaviors. Scratching behaviors developed with an average latency of 4 minutes 29 seconds  $\pm$  1 minute 37  
247 seconds and persisted for at least 30 minutes. We also observed that injection of 200 nM S1P into the  
248 rostral back triggered itch behaviors with an average scratching time of  $66 \pm 18.1$  seconds, which was



249 significantly greater than scratching evoked by vehicle (0.1% methanol-PBS;  $14.5 \pm 2.88$  seconds; Fig. 1d).  
250 To begin to elucidate the mechanisms underlying these effects, we focused on the S1P receptor S1PR3,  
251 which is required for S1P-evoked pain and pain hypersensitivity (Camprubi-Robles et al., 2013; Hill et al.,  
252 2018). Assessment of itch behavior in *S1pr3*<sup>-/-</sup> mice revealed significantly attenuated S1P-evoked  
253 scratching, indistinguishable from vehicle injection ( $10.6 \pm 12.3$  s versus  $6.3 \pm 6.2$  s, respectively; Fig. 1d).  
254 Furthermore, in a previous report, we observed no defects in itch responses to the pruritogens chloroquine  
255 and histamine in *S1pr3*<sup>-/-</sup> mice (Hill et al., 2018). These data suggest that S1PR3 is the primary receptor by  
256 which S1P signals in somatosensory neurons to drive itch. Our findings show that S1P can act as a  
257 pruritogen, selectively triggering itch at nanomolar concentrations, whereas at micromolar concentrations,  
258 S1P acts both as a pruritogen and algogen, triggering itch and pain. Our discovery that S1PR3 is required  
259 for S1P-evoked itch is consistent with previous studies showing that S1P-evoked acute pain (Camprubi-  
260 Robles et al., 2013), heat hypersensitivity, and mechanical pain (Hill et al., 2018) are absent in *S1pr3*<sup>-/-</sup>  
261 mice. These results add S1P to a growing list of endogenous molecules that act as both pruritogens and  
262 algogens (Shimada and LaMotte, 2008; Akiyama and Carstens, 2013; Moore et al., 2017; Esancy et al.,  
263 2018).

### 264 265 **S1PR3 is functional and expressed in a subset of pruriceptors**

266 We next asked whether S1PR3 is functional and expressed in itch neurons. Calcium imaging of S1P  
267 responses in wild-type mouse somatosensory neurons revealed that 1  $\mu$ M S1P activates 34.2% of all  
268 neurons, which fall into two main populations: 22.6% (66.1% of S1P<sup>+</sup> neurons) are TRPV1<sup>+</sup>/TRPA1<sup>+</sup>  
269 neurons, which are capsaicin- and allyl isothiocyanate (AITC)-sensitive, and 11.6% (33.9% of S1P<sup>+</sup>  
270 neurons) are TRPV1<sup>+</sup>/TRPA1<sup>-</sup> neurons, which are capsaicin-sensitive and AITC-insensitive (Fig. 2a,b).  
271 Neurons which were responsive to both AITC and S1P exhibited an EC<sub>50</sub> for S1P of 102 nM, and were  
272 activated by lower S1P concentrations (10 nM) than neurons which were responsive to capsaicin and S1P  
273 (EC<sub>50</sub> = 155 nM) and showed robust responses to 100 nM S1P (Fig. 2c). The complete overlap of S1P-  
274 responsive neurons with TRPV1<sup>+</sup> neurons is consistent with a role for S1P in itch and pain. Previous  
275 studies have shown that the MrgprA3<sup>+</sup> subpopulation of TRPA1<sup>+</sup> neurons is required for many forms of  
276 non-histaminergic acute and chronic itch (Liu et al., 2009, 2012; Wilson et al., 2011; Han et al., 2013;

277 Reddy et al., 2015; Zhu et al., 2017). In keeping with our hypothesized role for S1P in itch, 80% of  
278 chloroquine-responsive *MrgprA3*<sup>+</sup> neurons responded to S1P (Fig. 2b). We also observed a population of  
279 S1P-sensitive neurons which were sensitive to the pruritogen histamine (23.6% of S1P-sensitive neurons;  
280 Fig. 2b). We conclude that S1P activates thermal nociceptors that express TRPV1 and pruriceptors that  
281 express TRPA1 and TRPV1.

282

283 To pursue further the mechanism by which S1P acts in somatosensation, we examined the effects of  
284 pharmacological blockade of S1PR3 and S1PR1 on S1P-evoked calcium responses. Incubating cells with  
285 the S1PR3-selective antagonist TY 52156 attenuated S1P-evoked calcium transients with an IC<sub>50</sub> of 0.4  
286 μM (Fig. 2d). In contrast, the S1PR1-selective antagonist W146 had no discernable effect on S1P  
287 responses at a range of concentrations that exceed reported inhibitory concentrations (70-80 nM) for this  
288 drug (Fig. 2e; Finley et al., 2013; Janes et al., 2014). These data support previous studies showing that  
289 cultured somatosensory neurons from *S1pr3*<sup>-/-</sup> mice exhibit no calcium responses to 1 μM S1P (Camprubi-  
290 Robles et al., 2013; Hill et al., 2018) and suggest that S1PR3, but not S1PR1, is required for activation of  
291 pruriceptors and nociceptors by S1P.

292

293 While S1PR3 is expressed (Hill et al., 2018) and functional in distinct subsets of TRPV1<sup>+</sup> and  
294 TRPV1+/TRPA1<sup>+</sup> DRG neurons, whether this receptor is expressed in pruriceptors was unknown. To  
295 investigate this, we performed co-*in situ* hybridization (co-ISH) of *S1pr3* with *Mrgpra3*, which encodes the  
296 chloroquine receptor that marks a neuronal subpopulation required for some forms of acute and chronic  
297 itch (Liu et al., 2009). We found that 35.1% of *Mrgpra3*<sup>+</sup> cells express *S1pr3* and 11.6% of *S1pr3*<sup>+</sup> cells  
298 express *Mrgpra3* (Fig. 2f). The differing proportions of *S1pr3*<sup>+</sup>/*Mrgpra3*<sup>+</sup> neurons in our ISH and of  
299 S1P<sup>+</sup>/chloroquine<sup>+</sup> neurons in our calcium imaging studies (Fig. 2b) may reflect a difference between intact  
300 DRG versus cultured DRG neurons, and/or the sensitivity of mRNA expression versus calcium imaging  
301 assays. In summary, our calcium imaging and co-ISH data, along with our previous findings, reveal two  
302 main populations of small-diameter *S1pr3*<sup>+</sup> neurons: 1) *Trpv1*<sup>+</sup> thermal nociceptors and, 2) *Trpa1*<sup>+</sup> cells,  
303 including a subset of *Mrgpra3*<sup>+</sup> pruriceptors. These results dovetail with our finding that S1PR3 is required  
304 for S1P-evoked itch (Fig. 1d).

### 305 **S1P triggers neuronal activation in distinct subsets of nociceptors and pruriceptors**

306 We next sought to identify components downstream of S1PR3 underlying S1P-evoked calcium transients  
307 in cultured mouse somatosensory neurons. S1P responses were mediated solely by calcium influx, as  
308 chelation of extracellular calcium abolished all responses (Fig. 3a), suggesting that S1P triggers the  
309 opening of plasma membrane cation channels. We also observed similar results with application of  
310 Ruthenium Red (Fig. 3b), a blocker of a number of calcium-permeable ion channels, including Transient  
311 Receptor Potential (TRP) channels.

312

313 Since we observed that all S1P responsive neurons expressed TRPA1 and/or TRPV1, and these channels  
314 have been shown to functionally couple to a variety of GPCRs (Chuang et al., 2001; Prescott and Julius,  
315 2003; Bandell et al., 2004; Dai et al., 2007; Shim et al., 2007; Kwon et al., 2008; Rohacs et al., 2008;  
316 Imamachi et al., 2009; Schmidt et al., 2009; Wilson et al., 2011; Moore et al., 2017), we asked whether  
317 either channel mediated S1P-evoked neuronal activation. Neurons isolated from mice lacking both TRPA1  
318 and TRPV1 exhibited greatly attenuated S1P-evoked calcium responses, similar to those evoked by  
319 vehicle (Fig. 3c). Intriguingly, we found the percentage of S1P-responsive neurons was partially attenuated  
320 in neurons from *Trpv1*<sup>-/-</sup> (Fig. 3d) and *Trpa1*<sup>-/-</sup> single knockout mice (Fig. 3e). Such genetic effects were  
321 mirrored by pharmacological blockade of these channels: the TRPV1 antagonist capsazepine (50 μM;  
322 CPZ) or the TRPA1 antagonist HC-030031 (50 μM; HC) were sufficient to fully block capsaicin or AITC  
323 responses, respectively, and resulted in a significant, though partial, attenuation of neuronal S1P  
324 responses (Fig. 3f).

325

326 To test whether TRPA1 and/or TRPV1 are required for S1P-evoked neuronal excitability, we turned to  
327 current-clamp whole cell electrophysiology to examine action potential (AP) firing. For this purpose, we  
328 isolated and cultured DRG neurons from the *S1pr3*<sup>mCherry</sup> reporter mouse, which produces a functional  
329 S1PR3-mCherry fusion protein (Sanna et al., 2016), and examined their changes in membrane potential in  
330 response to S1P. Our experiments revealed that 1 μM S1P elicited AP firing in both the capsaicin-sensitive  
331 and AITC-sensitive S1PR3+ populations of sensory neurons (Fig. 3g-h, top). We next used a  
332 pharmacological approach to investigate the role of TRPV1 and TRPA1 in S1P-evoked AP firing. TRPV1

333 blockade with the antagonist CPZ decreased the proportion of neurons which fired APs in response to S1P  
334 and, as expected, completely blocked capsaicin-evoked AP firing in these neurons (Fig. 3g). Likewise,  
335 blockade of TRPA1 with HC resulted in a decreased proportion of cells which fired in response to S1P and  
336 the expected complete loss of AITC-evoked firing (Fig. 3h). These results suggest that TRPV1 and TRPA1  
337 directly contribute to S1P-evoked neuronal activation and AP firing. Combined with our calcium imaging  
338 studies using TRP channel inhibitors and A1/V1 knockout neurons, our data show that TRPA1 and TRPV1  
339 are required for S1P-evoked neuronal activation in distinct populations of somatosensory neurons.

340

### 341 **S1PR3 utilizes distinct G-protein coupled pathways to activate subsets of somatosensory neurons**

342 We used a pharmacological approach to investigate the mechanisms by which S1PR3 signals to TRPA1  
343 and TRPV1. We first focused on phospholipase C (PLC), a known target of the S1PR3 signaling partner  $G_q$   
344 (Kim et al., 2011; Flock et al., 2017). Given that GPCRs have been shown to activate TRPV1 and TRPA1  
345 channels via PLC activity in somatosensory neurons (Chuang et al., 2001; Prescott and Julius, 2003;  
346 Bandell et al., 2004; Shim et al., 2007; Dai et al., 2007; Kwon et al., 2008; Rohacs et al., 2008; Schmidt et  
347 al., 2009; Imamachi et al., 2009; Wilson et al., 2011; Paulsen et al., 2015; Gao et al., 2016; Moore et al.,  
348 2017), we hypothesized that PLC signaling could be required for S1P-evoked calcium responses in  
349 sensory neurons. This notion bore out, in that inhibition of PLC signaling using the drug U73122  
350 significantly decreased the percentage of neurons that displayed S1P-evoked calcium responses (Fig. 4a).  
351 This effect was most pronounced in the TRPA1<sup>-</sup> population of S1P-responsive neurons (Fig. 4b,c), but had  
352 only a small effect on the TRPA1<sup>+</sup> population (Fig. 4b,c). Next, given that GPCR signaling via  $G_{\beta\gamma}$  can  
353 activate TRPA1 (Wilson et al., 2011), we asked if  $G_{\beta\gamma}$  signaling could also play a role in S1P-evoked  
354 calcium responses. We observed a significant reduction in the percentage of neurons responding to S1P  
355 upon blockade of  $G_{\beta\gamma}$  activity using the drug gallein (Fig. 4a). And in contrast to PLC inhibition, gallein's  
356 effects were more robust in the TRPA1<sup>+</sup> population and were minimal in the TRPA1<sup>-</sup> population (Fig. 4b,c).  
357 Blockade of both pathways using U73122 and gallein resulted in a significant loss of all neurons responsive  
358 to S1P (Fig. 4a), irrespective of population (Fig. 4b,c). Thus, S1PR3 can signal in two different sensory  
359 neuronal subtypes (TRPA1<sup>+</sup>/TRPV1<sup>+</sup> and TRPA1<sup>-</sup>/TRPV1<sup>+</sup> neurons) in a concentration-dependent manner,  
360 using distinct molecular signaling molecules ( $G_{\beta\gamma}$  and PLC, respectively).

## 361 **S1P evokes itch and pain behaviors via distinct TRP channels**

362 Here we have shown that TRPA1 and TRPV1 are required for S1P-evoked neuronal excitation and  
363 calcium responses in pruriceptors and nociceptors. We thus tested the requirement of TRPA1 and TRPV1  
364 to S1P-evoked itch and pain behaviors. We observed that S1P evoked robust heat hypersensitivity in wild-  
365 type and *Trpa1*<sup>-/-</sup> mice, but not in *Trpv1*<sup>-/-</sup> mice (Fig. 5a). Similarly, 10 μM S1P triggered acute nocifensive  
366 behaviors (wiping) in wild-type and *Trpa1*<sup>-/-</sup> mice, but not in *Trpv1*<sup>-/-</sup> mice (Fig. 5b). Finally, we examined  
367 S1P-evoked itch behaviors in wild-type, *Trpa1*<sup>-/-</sup> and *Trpv1*<sup>-/-</sup> mice using the rostral back model. In contrast  
368 to our pain data, 200 nM S1P evoked robust scratching behaviors in wild-type and *Trpv1*<sup>-/-</sup> mice, but not in  
369 *Trpa1*<sup>-/-</sup> mice (Fig. 5c). These data support a model whereby TRPV1 selectively mediates S1P-evoked  
370 acute pain and heat hypersensitivity, whereas TRPA1 selectively mediates S1P-evoked acute itch (Figure  
371 6).

372

## 373 **Discussion**

374 Recent studies have linked aberrant S1P signaling to a variety of diseases, including: asthma (Chiba et al.,  
375 2010; Trankner et al., 2014; Roviezzo et al., 2015), multiple sclerosis (Brinkmann et al., 2010; Choi et al.,  
376 2011), cancer (Liang et al., 2013), psoriasis (Checa et al., 2015; Myśliwiec et al., 2016), and chronic pain  
377 (Patti et al., 2008; Janes et al., 2014; Grenald et al., 2017). Yet the cellular and molecular targets of S1P in  
378 these disorders are largely unknown. Here, we show that S1PR3 is required for S1P-evoked pain and itch,  
379 highlighting the potential for a direct contribution of S1P to sensitization, pain and/or itch in these diseases.

380

381 There is much interest in exploring the therapeutic potential of S1PR signaling in chronic pain and itch.  
382 However, little was known about the role of S1PRs in sensory neurons and their role in itch. We now show  
383 that S1P activates pruriceptors and triggers itch via S1PR3 and TRPA1. In mice, we found that injection of  
384 0.2 μM S1P triggered acute itch behaviors while concentrations at or above 2 μM triggered both itch and  
385 pain. S1PR3-deficient mice displayed a complete loss of S1P-evoked acute itch (Fig. 1d) and pain (Hill et  
386 al., 2018).

387

388 Our findings suggest sensory neuronal S1PR3 may play roles in disorders already linked to S1P signaling.  
389 Although S1P is produced by nearly every cell type, blood plasma contains the highest levels of S1P (low  
390 micromolar), and S1P is secreted in large amounts by activated mast cells (Idzko et al., 2002; Rivera et al.,  
391 2008; Olivera et al., 2013; Roviezzo et al., 2015; Saluja et al., 2017). Others have shown that sensory  
392 neurons innervating the lung express *S1pr3* and that administration of a non-selective S1P receptor  
393 agonist can enhance asthma-like airway hyperreactivity after acetylcholine challenge (Trankner et al.,  
394 2014), and that sensory neurons of the nodose ganglia are directly activated by S1P (Wang et al., 2017). It  
395 is also well known that TRPV1<sup>+</sup> sensory afferents are required for airway hypersensitivity (Rogerio et al.,  
396 2011). Furthermore, mast cells, which release S1P when activated (Saluja et al., 2017), play important  
397 roles in allergic asthma as well as itch, and we propose that S1PR3 may play an important role in  
398 mediating itch and/or airway hyperreactivity under these conditions.

399

400 We have identified two distinct populations of sensory neurons which are excited by S1P: the  
401 TRPA1<sup>+</sup>/TRPV1<sup>+</sup> and TRPA1<sup>-</sup>/TRPV1<sup>+</sup> populations, that have been shown to differentially contribute to itch  
402 and pain behaviors (Caterina et al., 2000; Bandell et al., 2004; Bautista et al., 2006b; Dai et al., 2007; Shim  
403 et al., 2007; Gerhold and Bautista, 2009; Imamachi et al., 2009; Wilson et al., 2011; Moore et al., 2017).  
404 Our observations that the TRPA1<sup>+</sup> population is activated by lower doses of S1P than the TRPA1<sup>-</sup>  
405 population (Fig. 2c), and that itch behaviors are triggered by doses which are non-painful (Fig. 1c),  
406 supports a recent study showing that both zebrafish and mouse pruriceptors are significantly more  
407 sensitive to stimuli than nociceptors. This increased sensitivity results in selective recruitment of  
408 pruriceptors over nociceptors by the same agonist in a dose-dependent manner, such that lower  
409 concentrations of agonist selectively trigger itch and higher concentrations trigger both itch and pain  
410 (Esancy et al., 2018). While that study observed these effects using the weak TRPA1 activator imiquimod  
411 and the strong TRPA1 activator AITC, we see similar effects using varying concentrations of S1P (Fig. 1). It  
412 is interesting that our results in the cheek model mirror theirs, and lend support to a peripheral “population  
413 coding” model wherein low intensity stimuli can selectively drive pruriceptor activation and itch while high  
414 intensity stimuli activate both nociceptors and pruriceptors to drive pain and itch. We show that more

415 S1P/S1PR3 signaling is required to activate nociceptors and drive pain behaviors than is required to  
416 activate pruriceptors and trigger itch.

417

418 But how, mechanistically, does this dose-dependent and selective activation of itch versus pain by S1P  
419 occur? A number of studies have generally implicated calcium-activated chloride and voltage-dependent  
420 potassium and sodium channels as being important for S1P-evoked neuronal excitation (Zhang et al.,  
421 2006a; Camprubi-Robles et al., 2013; Li et al., 2015). Here we show for the first time that both TRPA1 and  
422 TRPV1 play a key role in S1P-evoked AP firing in distinct subsets of somatosensory neurons and in itch  
423 and pain behaviors. TRP channels are nonselective cation channels that trigger calcium influx and  
424 depolarize the cell, and serve as important upstream transducers that trigger the activation of calcium- and  
425 voltage-sensitive channels. While S1P may activate multiple channels in somatosensory neurons, we have  
426 used pharmacological and genetic tools to show that TRPA1 and TRPV1 are essential for initiating S1P-  
427 evoked excitation and are differentially required for S1P-evoked itch and pain, respectively. Our  
428 experiments using G-protein pathway inhibitors suggest that S1PR3 utilizes distinct G-protein pathways to  
429 activate TRPA1 and TRPV1, which may contribute to differential initiation of itch and pain behaviors, and  
430 support a recent study suggesting that S1PR3 can couple to a number of downstream G-protein signaling  
431 pathways (Flock et al., 2017). While it is difficult to probe G-protein coupled pathways *in vivo*, it is tempting  
432 to speculate that the different signaling pathways downstream of S1PR3 *in vitro* may account for the  
433 differential engagement of pain and itch pathways by S1P.

434

435 While S1P signaling in general has been implicated in a variety of inflammatory skin diseases, our data  
436 suggest that S1PR3 may be an important contributor to cutaneous itch associated with these disorders.  
437 Fingolimod, which decreases S1PR activity at S1PRs 1,3,4 and 5 with varying affinity, has proven to be  
438 effective in reducing inflammation in mouse models of allergic contact dermatitis and in spontaneous  
439 dermatitis observed in the Nc/Nga mouse strain (Kohno et al., 2004; Sugita et al., 2010). Similarly,  
440 ponesimod, which inhibits S1PR1, decreases disease severity in psoriasis patients (D'ambrosio et al.,  
441 2016). In contrast, one study found that topical S1P can exert protective effects in mouse models of  
442 psoriasis and allergic contact dermatitis (Schaper et al., 2013). This is surprising, as one would expect S1P

443 to promote inflammation, rather than inhibit it. However, this may be due to the diverse roles different  
444 S1PRs may play in different cell types. For example, S1PR2 exerts proliferative effects on keratinocytes  
445 (Japtok et al., 2014), whereas S1PR1 directs immune cell migration into tissues (Matloubian et al., 2004).  
446 Our findings suggest that S1P/S1PR3 signaling may play an important role in itch sensations associated  
447 with these skin disorders.

448

449 Several S1PR modulators are currently in use or in clinical trial for diseases linked to pain and/or itch,  
450 including multiple sclerosis, IBD, and psoriasis (Brinkmann et al., 2010; Kunkel et al., 2013; Degagné and  
451 Saba, 2014). Of particular note is ponesimod, which is in clinical trials for psoriasis treatment (Vaclavkova  
452 et al., 2014). Whereas ponesimod acts on the immune system and targets S1PR1 to combat inflammation,  
453 we propose neuronal S1P/S1PR3 signaling as a potential target for the treatment of inflammatory pain and  
454 itch. We showed previously that loss of S1PR3 can block inflammatory pain without affecting immune cell  
455 recruitment, and that a selective S1PR3 antagonist can ameliorate inflammatory hypersensitivity,  
456 suggesting that S1PR3-specific blockers may be effective for treating pain (Hill et al., 2018). Our finding  
457 that S1P can act as a pruritogen also suggests a role for S1P/S1PR3 in chronic itch, where circulating S1P  
458 levels have been found to be significantly increased in human psoriasis patients (Checa et al., 2015;  
459 Myśliwiec et al., 2016). While we and others have demonstrated the relevance of S1PR3 signaling to  
460 chronic pain, it will be essential to explore the role of S1P/S1PR3 signaling in chronic itch models to  
461 ascertain its pathological relevance. Our data supports a key role for S1PR3 in activation of pain and itch  
462 neurons and may inform rational design of S1P and S1PR modulators to treat pain, itch, and inflammatory  
463 skin diseases.

464

## 465 References

- 466 1. Akiyama T, Carstens E (2013) Neural processing of itch. *Neuroscience* 250:697–71 Available at:  
467 <http://dx.doi.org/10.1016/j.neuroscience.2013.07.035>.
- 468 2. Bandell M, Story GM, Hwang SW, Viswanath V, Eid SR, Petrus MJ, Earley TJ, Patapoutian A  
469 (2004) Noxious cold ion channel TRPA1 is activated by pungent compounds and bradykinin.  
470 *Neuron* 41:849–857.
- 471 3. Bäumer W, Rossbach K, Mischke R, Reines I, Langbein-Detsch I, Lüth A, Kleuser B (2011)  
472 Decreased concentration and enhanced metabolism of sphingosine-1-phosphate in lesional skin of  
473 dogs with atopic dermatitis: disturbed sphingosine-1-phosphate homeostasis in atopic dermatitis. *J*  
474 *Invest Dermatol* 131:266–268.
- 475 4. Bautista DM, Jordt SE, Nikai T, Tsuruda PR, Read AJ, Pobleto J, Yamoah EN, Basbaum AI, Julius



- 476 D (2006a) TRPA1 Mediates the Inflammatory Actions of Environmental Irritants and Proalgesic  
477 Agents. *Cell* 124:1269–1282.
- 478 5. Bautista DM, Jordt SE, Nikai T, Tsuruda PR, Read AJ, Poblete J, Yamoah EN, Basbaum AI, Julius  
479 D (2006b) TRPA1 Mediates the Inflammatory Actions of Environmental Irritants and Proalgesic  
480 Agents. *Cell* 124:1269–1282.
- 481 6. Brinkmann V, Billich A, Baumruker T, Heining P, Schmouder R, Francis G, Aradhye S, Burtin P  
482 (2010) Fingolimod (FTY720): discovery and development of an oral drug to treat multiple sclerosis.  
483 *Nat Rev Drug Discov* 9:883–897 Available at: <http://www.ncbi.nlm.nih.gov/pubmed/21031003>.
- 484 7. Brossard P, Derendorf H, Xu J, Maatouk H, Halabi A, Dingemans J (2013) Pharmacokinetics and  
485 pharmacodynamics of ponesimod, a selective S1P 1 receptor modulator, in the first-in-human  
486 study. *Br J Clin Pharmacol* 76:888–896.
- 487 8. Camprubi-Robles M, Mair N, Andratsch M, Benetti C, Beroukas D, Rukwied R, Langeslag M, Proia  
488 RL, Schmelz M, Ferrer Montiel A V, Haberberger R V, Kress M, Camprubi-Robles M (2013)  
489 Sphingosine-1-phosphate-induced nociceptor excitation and ongoing pain behavior in mice and  
490 humans is largely mediated by S1P3 receptor. *J Neurosci* 33:2582–2592 Available at:  
491 <http://www.ncbi.nlm.nih.gov/pubmed/23392686>.
- 492 9. Castelino F V., Varga J (2014) Emerging cellular and molecular targets in fibrosis: Implications for  
493 scleroderma pathogenesis and targeted therapy. *Curr Opin Rheumatol* 26:607–614.
- 494 10. Caterina MJ, Leffler A, Malmberg AB, Martin WJ, Trafton J, Petersen-Zeitz KR, Koltzenburg M,  
495 Basbaum AI, Julius D (2000) Impaired Nociception and Pain Sensation in Mice Lacking the  
496 Capsaicin Receptor. *Science* (80- ) 288:306–313 Available at:  
497 <http://www.sciencemag.org/cgi/doi/10.1126/science.288.5464.306>.
- 498 11. Checa A, Xu N, Sar DG, Haeggström JZ, Ståhle M, Wheelock CE (2015) Circulating levels of  
499 sphingosine-1-phosphate are elevated in severe, but not mild psoriasis and are unresponsive to  
500 anti-TNF- $\alpha$  treatment. *Sci Rep* 5:12017 Available at:  
501 <http://www.ncbi.nlm.nih.gov/pubmed/26174087>.
- 502 12. Chiba Y, Takeuchi H, Sakai H, Misawa M (2010) SKI-II, an inhibitor of sphingosine kinase,  
503 ameliorates antigen-induced bronchial smooth muscle hyperresponsiveness, but not airway  
504 inflammation, in mice. *J Pharmacol Sci* 114:304–310.
- 505 13. Choi JW, Gardell SE, Herr DR, Rivera R, Lee C-W, Noguchi K, Teo ST, Yung YC, Lu M, Kennedy  
506 G, Chun J (2011) FTY720 (fingolimod) efficacy in an animal model of multiple sclerosis requires  
507 astrocyte sphingosine 1-phosphate receptor 1 (S1P1) modulation. *Proc Natl Acad Sci U S A*  
508 108:751–756 Available at: [papers3://publication/doi/10.1073/pnas.1014154108/-](papers3://publication/doi/10.1073/pnas.1014154108/-/DCSupplemental/pnas.201014154SI.pdf%5Cnhttp://www.pubmedcentral.nih.gov/articlerender.fcgi?artid=3021041&tool=pmcentrez&rendertype=abstract)  
509 [/DCSupplemental/pnas.201014154SI.pdf%5Cnhttp://www.pubmedcentral.nih.gov/articlerender.fcgi](http://www.pubmedcentral.nih.gov/articlerender.fcgi?artid=3021041&tool=pmcentrez&rendertype=abstract)  
510 [?artid=3021041&tool=pmcentrez&rendertype=abstract](http://www.pubmedcentral.nih.gov/articlerender.fcgi?artid=3021041&tool=pmcentrez&rendertype=abstract).
- 511 14. Chuang HH, Prescott ED, Kong H, Shields S, Jordt SE, Basbaum AI, Chao M V, Julius D (2001)  
512 Bradykinin and nerve growth factor release the capsaicin receptor from PtdIns(4,5)P2-mediated  
513 inhibition. *Nature* 411:957–962.
- 514 15. Cyster JG, Schwab SR (2012) Sphingosine-1-Phosphate and Lymphocyte Egress from Lymphoid  
515 Organs. *Annu Rev Immunol* 30:69–94 Available at:  
516 <http://www.annualreviews.org/doi/abs/10.1146/annurev-immunol-020711-075011>.
- 517 16. D'ambrosio D, Freedman MS, Prinz J (2016) Ponesimod, a selective S1P1 receptor modulator: A  
518 potential treatment for multiple sclerosis and other immune-mediated diseases. *Ther Adv Chronic*  
519 *Dis* 7:18–33.
- 520 17. Dai Y, Wang S, Tominaga M, Yamamoto S, Fukuoka T, Higashi T, Kobayashi K, Obata K,  
521 Yamanaka H, Noguchi K (2007) Sensitization of TRPA1 by PAR2 contributes to the sensation of  
522 inflammatory pain. *J Clin Invest* 117:1979–1987.
- 523 18. Degagné E, Saba JD (2014) S1P ping fire: Sphingosine-1-phosphate signaling as an emerging  
524 target in inflammatory bowel disease and colitis-associated cancer. *Clin Exp Gastroenterol* 7:205–  
525 214.
- 526 19. Donoviel MS, Hait NC, Ramachandran S, Maceyka M, Takabe K, Milstien S, Oravec T, Spiegel S  
527 (2015) Spinster 2, a sphingosine 1-phosphate transporter, plays a Critical Role in inflammatory and  
528 Autoimmune Diseases. *FASEB J* 29:5018–5028.
- 529 20. Esancy K, Condon L, Feng J, Kimball C, Curtright A, Dhaka A (2018) A zebrafish and mouse model  
530 for selective pruritus via direct activation of TRPA1. *Elife* 7:1–24 Available at:  
531 <http://www.ncbi.nlm.nih.gov/pubmed/29561265%0Ahttps://elifesciences.org/articles/32036>.

- 532 21. Finley a, Chen Z, Esposito E, Cuzzocrea S, Sabbadini R, Salvemini D (2013) Sphingosine 1-  
533 phosphate mediates hyperalgesia via a neutrophil-dependent mechanism. *PLoS One* 8:e55255  
534 Available at:  
535 <http://www.ncbi.nlm.nih.gov/pubmed/23372844>[http://www.plosone.org/article/](http://www.plosone.org/article/fetchObject.action?uri=info:doi/10.1371/journal.pone.0055255&representation=PDF)  
536 [fetchObject.action?uri=info:doi/10.1371/journal.pone.0055255&representation=PDF](http://www.plosone.org/article/fetchObject.action?uri=info:doi/10.1371/journal.pone.0055255&representation=PDF).  
537 22. Flock T, Hauser AS, Lund N, Gloriam DE, Balaji S, Babu MM (2017) Selectivity determinants of  
538 GPCR-G-protein binding. *Nature* 545:317–322 Available at: <http://dx.doi.org/10.1038/nature22070>.  
539 23. Gao Y, Cao E, Julius D, Cheng Y (2016) TRPV1 structures in nanodiscs reveal mechanisms of  
540 ligand and lipid action. *Nature* 534:347–351 Available at: <http://dx.doi.org/10.1038/nature17964>.  
541 24. Gerhold K a., Bautista DM (2009) Molecular and cellular mechanisms of trigeminal  
542 chemosensation. *Ann N Y Acad Sci* 1170:184–189.  
543 25. Gerhold K a., Pellegrino M, Tsunozaki M, Morita T, Leitch DB, Tsuruda PR, Brem RB, Catania KC,  
544 Bautista DM (2013) The Star-Nosed Mole Reveals Clues to the Molecular Basis of Mammalian  
545 Touch. *PLoS One* 8.  
546 26. Grenald SA, Doyle TM, Zhang H, Slosky LM, Chen Z, Largent-Milnes TM, Spiegel S, Vanderah TW,  
547 Salvemini D (2017) Targeting the S1P/S1PR1 axis mitigates cancer-induced bone pain and  
548 neuroinflammation. *Pain* 158:1 Available at: [http://insights.ovid.com/crossref?an=00006396-](http://insights.ovid.com/crossref?an=00006396-900000000-99231%5Cnhttp://www.ncbi.nlm.nih.gov/pubmed/28570482)  
549 [900000000-99231%5Cnhttp://www.ncbi.nlm.nih.gov/pubmed/28570482](http://www.ncbi.nlm.nih.gov/pubmed/28570482).  
550 27. Han L, Ma C, Liu Q, Weng H, Cui Y, Tang Z, Guan Y, Xiao B, Lamotte R, Dong X (2013) A  
551 subpopulation of nociceptors specifically linked to itch. *Nat Neurosci* 16:174–182.  
552 28. Hill RZ, Hoffman BU, Morita T, Campos SM, Lumpkin EA, Brem RB, Bautista DM (2018) The  
553 signaling lipid sphingosine 1-phosphate regulates mechanical pain. *Elife* 7:e33285 Available at:  
554 <https://elifesciences.org/articles/33285>.  
555 29. Hou J-C, Fang X-M (2015) S1P-S1PRs Alliance in Neuropathic Pain Processing. *J Anaesth*  
556 *Perioper Med* 2:1–9.  
557 30. Idzko M, Panther E, Corinti S, Morelli A, Ferrari D, Herouy Y, Dichmann S, Mockenhaupt M,  
558 Gebicke-Haerter P, Di Virgilio F, Girolomoni G, Norgauer J (2002) Sphingosine 1-phosphate  
559 induces chemotaxis of immature and modulates cytokine-release in mature human dendritic cells  
560 for emergence of Th2 immune responses. *FASEB J* 16:625–627.  
561 31. Imamachi N, Park GH, Lee H, Anderson DJ, Simon MI, Basbaum AI, Han S-K (2009) TRPV1-  
562 expressing primary afferents generate behavioral responses to pruritogens via multiple  
563 mechanisms. *Proc Natl Acad Sci U S A* 106:11330–11335.  
564 32. Janes K, Little JW, Li C, Bryant L, Chen C, Chen Z, Kamocki K, Doyle T, Snider A, Esposito E,  
565 Cuzzocrea S, Bieberich E, Obeid L, Petrache I, Nicol G, Neumann WL, Salvemini D (2014) The  
566 development and maintenance of paclitaxel-induced neuropathic pain require activation of the  
567 sphingosine 1-phosphate receptor subtype 1. *J Biol Chem* 289:21082–21097.  
568 33. Japtok L, Bäumer W, Kleuser B (2014) Sphingosine-1-phosphate as signaling molecule in the skin.  
569 *Allergo J Int* 23:54–59 Available at: <http://link.springer.com/10.1007/s40629-014-0008-2>.  
570 34. Kim E-S, Kim J-S, Kim SG, Hwang S, Lee CH, Moon A (2011) Sphingosine 1-phosphate regulates  
571 matrix metalloproteinase-9 expression and breast cell invasion through S1P3-G q coupling. *J Cell*  
572 *Sci* 124:2220–2230 Available at: <http://jcs.biologists.org/cgi/doi/10.1242/jcs.076794>.  
573 35. Kohno T, Tsuji T, Hirayama K, Watabe K, Matsumoto A, Kohno T, Fujita T (2004) A novel  
574 immunomodulator, FTY720, prevents spontaneous dermatitis in NC/Nga mice. *Biol Pharm Bull*  
575 27:1392–1396 Available at: <http://www.ncbi.nlm.nih.gov/pubmed/15340225>.  
576 36. Kono M, Mi Y, Liu Y, Sasaki T, Allende ML, Wu YP, Yamashita T, Proia RL (2004) The  
577 sphingosine-1-phosphate receptors S1P1, S1P2, and S1P3 function coordinately during embryonic  
578 angiogenesis. *J Biol Chem* 279:29367–29373.  
579 37. Krause A, D’Ambrosio D, Dingemans J (2017) Modeling clinical efficacy of the S1P receptor  
580 modulator ponesimod in psoriasis. *J Dermatol Sci* 89:136–145 Available at:  
581 <http://dx.doi.org/10.1016/j.jdermsci.2017.11.003>.  
582 38. Kunkel GT, Maceyka M, Milstien S, Spiegel S (2013) Targeting the sphingosine-1-phosphate axis in  
583 cancer, inflammation and beyond. *Nat Rev Drug Discov* 12:688–702 Available at:  
584 [http://www.pubmedcentral.nih.gov/articlerender.fcgi?artid=3908769&tool=pmcentrez&rendertype=](http://www.pubmedcentral.nih.gov/articlerender.fcgi?artid=3908769&tool=pmcentrez&rendertype=abstract)  
585 [abstract](http://www.pubmedcentral.nih.gov/articlerender.fcgi?artid=3908769&tool=pmcentrez&rendertype=abstract).  
586 39. Kwon Y, Shim H-S, Wang X, Montell C (2008) Control of thermotactic behavior via coupling of a  
587 TRP channel to a phospholipase C signaling cascade. *Nat Neurosci* 11:871–873.

- 588 40. Li C, Li J, Kays J, Guerrero M, Nicol GD (2015) Sphingosine 1-phosphate enhances the excitability  
589 of rat sensory neurons through activation of sphingosine 1-phosphate receptors 1 and/or 3. *J*  
590 *Neuroinflammation* 12:1–20 Available at: <http://www.jneuroinflammation.com/content/12/1/70>.
- 591 41. Liang J, Nagahashi M, Kim EY, Harikumar KB, Yamada A, Huang WC, Hait NC, Allegood JC, Price  
592 MM, Avni D, Takabe K, Kordula T, Milstien S, Spiegel S (2013) Sphingosine-1-Phosphate Links  
593 Persistent STAT3 Activation, Chronic Intestinal Inflammation, and Development of Colitis-  
594 Associated Cancer. *Cancer Cell* 23:107–120 Available at:  
595 <http://dx.doi.org/10.1016/j.ccr.2012.11.013>.
- 596 42. Liu Q, Sikand P, Ma C, Tang Z, Han L, Li Z, Sun S, LaMotte RH, Dong X (2012) Mechanisms of itch  
597 evoked by  $\beta$ -alanine. *J Neurosci* 32:14532–14537 Available at:  
598 [http://www.pubmedcentral.nih.gov/articlerender.fcgi?artid=3491570%7B&%7Dtool=pmcentrez%7B](http://www.pubmedcentral.nih.gov/articlerender.fcgi?artid=3491570%7B&%7Dtool=pmcentrez%7B&%7Drendertype=abstract)  
599 [&%7Drendertype=abstract](http://www.pubmedcentral.nih.gov/articlerender.fcgi?artid=3491570%7B&%7Dtool=pmcentrez%7B&%7Drendertype=abstract).
- 600 43. Liu Q, Tang Z, Surdenikova L, Kim S, Patel KN, Kim A, Ru F, Guan Y, Weng HJ, Geng Y, Udem  
601 BJ, Kollarik M, Chen ZF, Anderson DJ, Dong X (2009) Sensory Neuron-Specific GPCR Mrgprs Are  
602 Itch Receptors Mediating Chloroquine-Induced Pruritus. *Cell* 139:1353–1365 Available at:  
603 <http://dx.doi.org/10.1016/j.cell.2009.11.034>.
- 604 44. Mair N, Benetti C, Andratsch M, Leitner MG, Constantin CE, Camprubí-Robles M, Quarta S, Biasio  
605 W, Kuner R, Gibbins IL, Kress M, Haberberger R V. (2011) Genetic evidence for involvement of  
606 neuronally expressed s1P1 receptor in nociceptor sensitization and inflammatory pain. *PLoS One* 6.  
607 45. Matloubian M, Lo CG, Cinamon G, Lesneski MJ, Xu Y, Brinkmann V, Allende ML, Proia RL, Cyster  
608 JG (2004) Lymphocyte egress from thymus and peripheral lymphoid organs is dependent on S1P  
609 receptor 1. *Nature* 427:355–360.
- 610 46. Moore C, Gupta R, Jordt S-E, Chen Y, Liedtke WB (2017) Regulation of Pain and Itch by TRP  
611 Channels. *Neurosci Bull* Available at:  
612 [http://www.ncbi.nlm.nih.gov/pubmed/29282613%0Ahttp://link.springer.com/10.1007/s12264-017-](http://www.ncbi.nlm.nih.gov/pubmed/29282613%0Ahttp://link.springer.com/10.1007/s12264-017-0200-8)  
613 [0200-8](http://www.ncbi.nlm.nih.gov/pubmed/29282613%0Ahttp://link.springer.com/10.1007/s12264-017-0200-8).
- 614 47. Morita T, McClain SP, Batia LM, Pellegrino M, Wilson SR, Kienzler MA, Lyman K, Olsen ASB,  
615 Wong JF, Stucky CL, Brem RB, Bautista DM (2015) HTR7 Mediates Serotonergic Acute and  
616 Chronic Itch. *Neuron* 87:124–138 Available at: <http://dx.doi.org/10.1016/j.neuron.2015.05.044>.
- 617 48. Myśliwiec H, Baran A, Harasim-Symbor E, Choromańska B, Myśliwiec P, Milewska AJ, Chabowski  
618 A, Flisiak I (2016) Increase in circulating sphingosine-1-phosphate and decrease in ceramide levels  
619 in psoriatic patients. *Arch Dermatol Res* Available at:  
620 [http://www.ncbi.nlm.nih.gov/pubmed/27988894%0Ahttp://link.springer.com/10.1007/s00403-016-](http://www.ncbi.nlm.nih.gov/pubmed/27988894%0Ahttp://link.springer.com/10.1007/s00403-016-1709-9)  
621 [1709-9](http://www.ncbi.nlm.nih.gov/pubmed/27988894%0Ahttp://link.springer.com/10.1007/s00403-016-1709-9).
- 622 49. Olivera A, Allende ML, Proia RL (2013) Shaping the landscape: Metabolic regulation of S1P  
623 gradients. *Biochim Biophys Acta - Mol Cell Biol Lipids* 1831:193–202 Available at:  
624 <http://dx.doi.org/10.1016/j.bbalip.2012.06.007>.
- 625 50. Patti G, Yanes O, Shriver L, Courade J-P, Tautenhahn R, Manchester M, Siuzdak G (2008)  
626 Metabolomics implicates altered sphingolipids in chronic pain of neuropathic origin. *Nat Chem Biol*  
627 8:232–234.
- 628 51. Paulsen CE, Armache J, Gao Y, Cheng Y, Julius D (2015) Structure of the TRPA1 ion channel  
629 suggests regulatory mechanisms. *Nature* 520:511–517.
- 630 52. Prescott E, Julius D (2003) A Modular PIP 2 Binding Site as a Determinant of Capsaicin Receptor  
631 Sensitivity. *Science* (80- ) 300:1284–1288.
- 632 53. Reddy VB, Sun S, Azimi E, Elmariah SB, Dong X, Lerner EA (2015) Redefining the concept of  
633 protease-activated receptors: cathepsin S evokes itch via activation of Mrgprs. *Nat Commun* 6:7864  
634 Available at: <http://www.nature.com/ncomms/2015/150728/ncomms8864/full/ncomms8864.html>.
- 635 54. Rivera J, Proia RL, Olivera A (2008) The alliance of sphingosine-1-phosphate and its receptors in  
636 immunity. *Nat Rev Immunol* 8:753–763 Available at:  
637 <http://www.nature.com/doifinder/10.1038/nri2400>.
- 638 55. Rogerio AP, Andrade EL, Calixto JB (2011) C-fibers, but not the transient potential receptor  
639 vanilloid 1 (TRPV1), play a role in experimental allergic airway inflammation. *Eur J Pharmacol*  
640 662:55–62 Available at: <http://dx.doi.org/10.1016/j.ejphar.2011.04.027>.
- 641 56. Rohacs T, Thyagarajan B, Lukacs V (2008) Phospholipase C mediated modulation of TRPV1  
642 channels. *Mol Neurobiol* 37:153–163.
- 643 57. Roviezzo F, Sorrentino R, Bertolino A, De Gruttola L, Terlizzi M, Pinto A, Napolitano M, Castello G,

- 644 D'Agostino B, Ianaro A, Sorrentino R, Cirino G (2015) S1P-induced airway smooth muscle  
645 hyperresponsiveness and lung inflammation in vivo: Molecular and cellular mechanisms. *Br J*  
646 *Pharmacol* 172:1882–1893.
- 647 58. Saluja R, Kumar A, Jain M, Goel SK, Jain A (2017) Role of sphingosine-1-phosphate in mast cell  
648 functions and asthma and its regulation by non-coding RNA. *Front Immunol* 8:1–7.
- 649 59. Sanna MG, Vincent KP, Repetto E, Nhan N, Brown SJ, Abgaryan L, Riley SW, Leaf NB, Cahalan  
650 SM, Kiosses WB, Kohno Y, Heller Brown J, McCulloch AD, Rosen H, Gonzalez-Cabrera PJ (2016)  
651 Bitopic S1P3 Antagonist Rescue from Complete Heart Block: Pharmacological and Genetic  
652 Evidence for Direct S1P3 Regulation of Mouse Cardiac Conduction. *Mol Pharmacol* 89:176–186  
653 Available at: <http://molpharm.aspetjournals.org/cgi/doi/10.1124/mol.115.100222>.
- 654 60. Schaper K, Dickhaut J, Japtok L, Kietzmann M, Mischke R, Kleuser B, Bäumer W (2013)  
655 Sphingosine-1-phosphate exhibits anti-proliferative and anti-inflammatory effects in mouse models  
656 of psoriasis. *J Dermatol Sci* 71:29–36.
- 657 61. Schmidt M, Dubin AE, Petrus MJ, Earley TJ, Patapoutian A (2009) Nociceptive Signals Induce  
658 Trafficking of TRPA1 to the Plasma Membrane. *Neuron* 64:498–509 Available at:  
659 <http://dx.doi.org/10.1016/j.neuron.2009.09.030>.
- 660 62. Schüppel M, Kürschner U, Kleuser U, Schäfer-Korting M, Kleuser B (2008) Sphingosine 1-  
661 phosphate restrains insulin-mediated keratinocyte proliferation via inhibition of Akt through the  
662 S1P2 receptor subtype. *J Invest Dermatol* 128:1747–1756.
- 663 63. Shim W-S, Tak M-H, Lee M-H, Kim M, Kim M, Koo J-Y, Lee C-H, Kim M, Oh U (2007) TRPV1  
664 mediates histamine-induced itching via the activation of phospholipase A2 and 12-lipoxygenase. *J*  
665 *Neurosci* 27:2331–2337 Available at: <http://www.jneurosci.org/cgi/content/full/27/9/2331>.
- 666 64. Shimada SG, LaMotte RH (2008) Behavioral differentiation between itch and pain in mouse. *Pain*  
667 139:681–687.
- 668 65. Sugita K, Kabashima K, Sakabe JI, Yoshiki R, Tanizaki H, Tokura Y (2010) FTY720 regulates bone  
669 marrow egress of eosinophils and modulates late-phase skin reaction in mice. *Am J Pathol*  
670 177:1881–1887 Available at: <http://dx.doi.org/10.2353/ajpath.2010.100119>.
- 671 66. Thieme M, Zillikens D, Sadik CD (2017) Sphingosine-1-phosphate modulators in inflammatory skin  
672 diseases – lining up for clinical translation. *Exp Dermatol* 26:206–210.
- 673 67. Trankner D, Hahne N, Sugino K, Hoon MA, Zuker C (2014) Population of sensory neurons essential  
674 for asthmatic hyperreactivity of inflamed airways. *Proc Natl Acad Sci* 111:11515–11520 Available  
675 at: <http://www.pnas.org/cgi/doi/10.1073/pnas.1411032111>.
- 676 68. Tsunozaki M, Lennertz RC, Vilceanu D, Katta S, Stucky CL, Bautista DM (2013) A “toothache tree”  
677 alkylamide inhibits A $\delta$  mechanonociceptors to alleviate mechanical pain. *J Physiol* 591:3325–3340  
678 Available at: <http://jpp.physoc.org/content/591/13/3325.long>.
- 679 69. Usoskin D, Furlan A, Islam S, Abdo H, Lönnerberg P, Lou D, Hjerling-Leffler J, Haeggström J,  
680 Kharchenko O, Kharchenko P V, Linnarsson S, Ernfors P (2015) Unbiased classification of sensory  
681 neuron types by large-scale single-cell RNA sequencing. *Nat Neurosci* 18:145–153 Available at:  
682 <http://dx.doi.org/10.1038/nn.3881>.
- 683 70. Vaclavkova A, Chimenti S, Arenberger P, Holló P, Sator PG, Burcklen M, Stefani M, D'Ambrosio D  
684 (2014) Oral ponesimod in patients with chronic plaque psoriasis: A randomised, double-blind,  
685 placebo-controlled phase 2 trial. *Lancet* 384:2036–2045.
- 686 71. Wang J, Kollarik M, Ru F, Sun H, Mcneil B, Dong X, Stephens G, Korolevich S, Brohawn P,  
687 Kolbeck R, Udem B (2017) Distinct and common expression of receptors for inflammatory  
688 mediators in vagal nodose versus jugular capsaicin-sensitive / TRPV1- positive neurons detected  
689 by low input RNA sequencing. :1–20.
- 690 72. Weth D, Benetti C, Rauch C, Gstraunthaler G, Schmidt H, Geisslinger G, Sabbadini R, Proia RL,  
691 Kress M (2015) Activated platelets release sphingosine 1-phosphate and induce hypersensitivity to  
692 noxious heat stimuli in vivo. *Front Neurosci* 9:1–8 Available at:  
693 <http://journal.frontiersin.org/article/10.3389/fnins.2015.00140/abstract>.
- 694 73. Wilson SR, Gerhold K a, Bifolck-Fisher A, Liu Q, Patel KN, Dong X, Bautista DM (2011) TRPA1 is  
695 required for histamine-independent, Mas-related G protein-coupled receptor-mediated itch. *Nat*  
696 *Neurosci* 14:595–602 Available at: <http://dx.doi.org/10.1038/nn.2789>.
- 697 74. Yamashita-Sugahara Y, Tokuzawa Y, Nakachi Y, Kanesaki-Yatsuka Y, Matsumoto M, Mizuno Y,  
698 Okazaki Y (2013) Fam57b (Family with sequence similarity 57, member B), a novel peroxisome  
699 proliferator-activated receptor  $\gamma$  target gene that regulates adipogenesis through ceramide

- 700 synthesis. *J Biol Chem* 288:4522–4537.
- 701 75. Zhang YH, Fehrenbacher JC, Vasko MR, Nicol GD (2006a) Sphingosine-1-Phosphate Via
- 702 Activation of a G-Protein-Coupled Receptor(s) Enhances the Excitability of Rat Sensory Neurons. *J*
- 703 *Neurophysiol* 96:1042–1052 Available at: <http://www.physiology.org/doi/10.1152/jn.00120.2006>.
- 704 76. Zhang YH, Vasko MR, Nicol GD (2006b) Intracellular sphingosine 1-phosphate mediates the
- 705 increased excitability produced by nerve growth factor in rat sensory neurons. *J Physiol* 575:101–
- 706 113.
- 707 77. Zhu Y, Hanson CE, Liu Q, Han L (2017) Mrgprs activation is required for chronic itch conditions in
- 708 mice. *Itch* 2:e09.
- 709
- 710

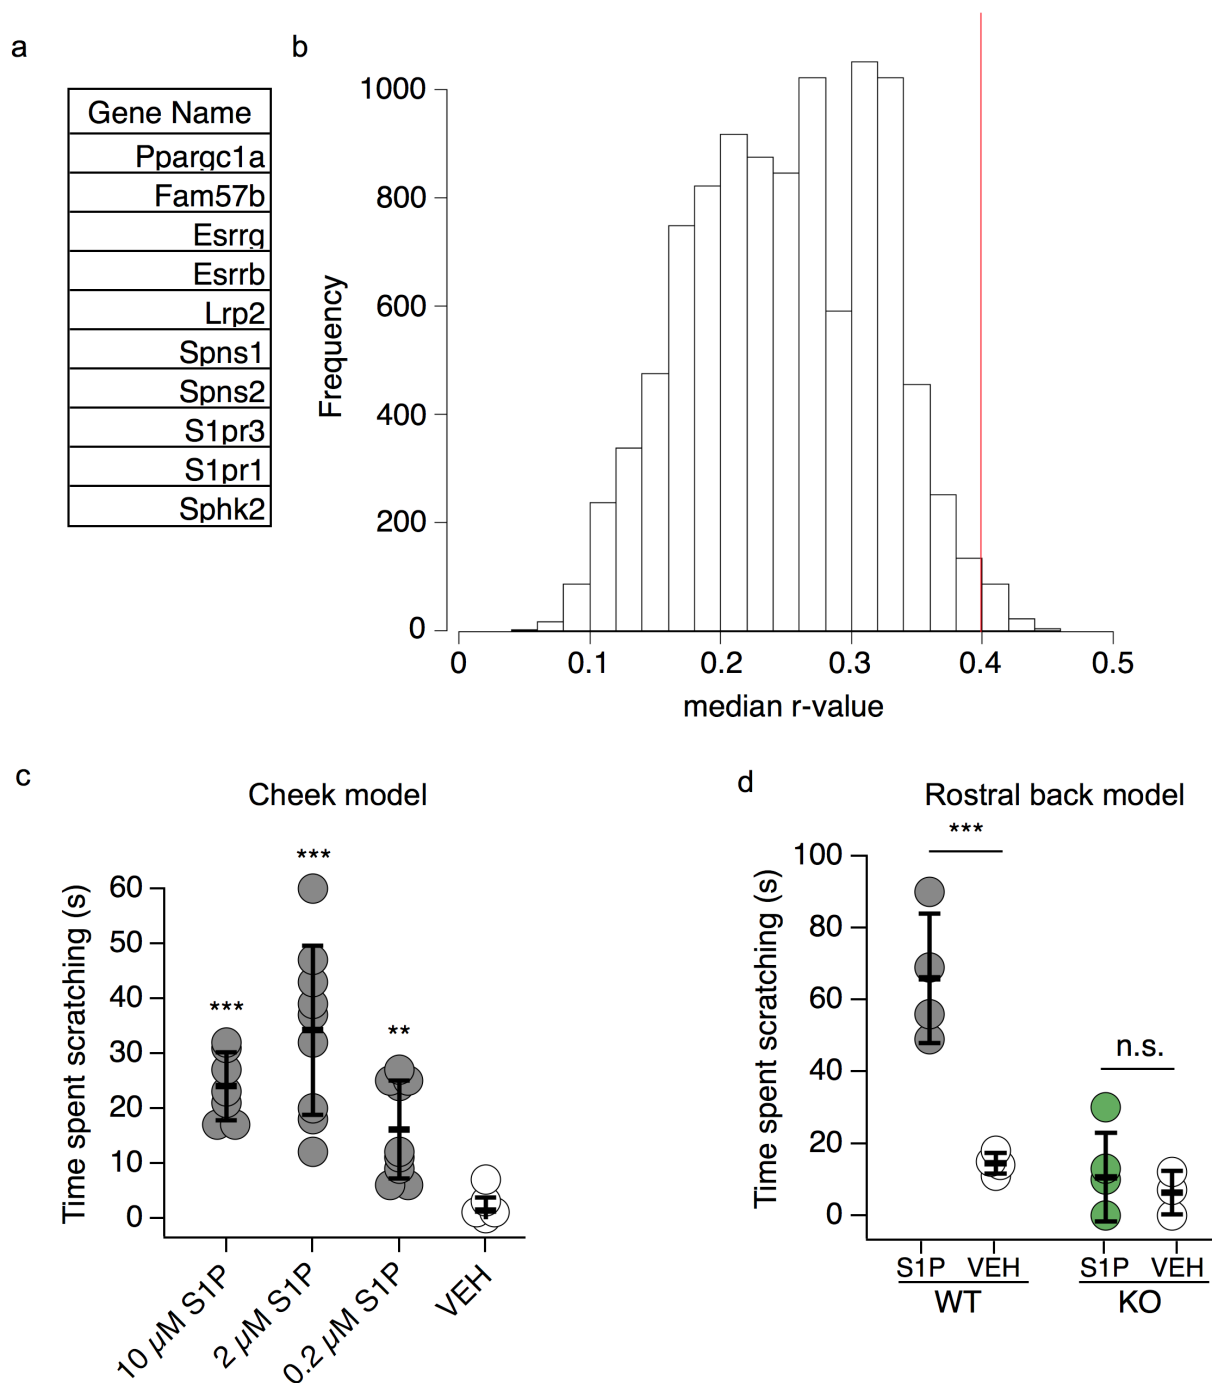

Figure 1

**Figure 1. S1P triggers itch via S1PR3.** **a.** Tabular list of the top 10 most highly expressed sphingosine 1-phosphate (S1P) pathway genes in dorsal root ganglion (DRG) neurons. **b.** Histogram showing median absolute r-value for gene expression vs. itch plotted against frequency for 10,000 permutations of random subsets of 10 genes in the BXD DRG transcriptome. Red line indicates median r-value for S1P genes ( $p = 0.0116$ ,  $r_{\text{median}} = 0.399$ , see Methods). **c.** (Left) Intradermal cheek injection of 10  $\mu\text{M}$  S1P, 2  $\mu\text{M}$ , 0.2  $\mu\text{M}$ , and 20  $\mu\text{L}$  1% methanol PBS (VEH), with quantification of time spent scratching over the 30-minute post-injection interval;  $p < 0.0001$  (one-way ANOVA ( $F(3,30) = 18.29$ );  $N = 7-9$  mice per condition). Dunnett's multiple comparisons  $p$ -values are represented on graph for comparisons made between treated and vehicle groups. **d.** Time spent scratching in response to intradermal injection of 20  $\mu\text{L}$  0.2  $\mu\text{M}$  S1P or 0.1% methanol-PBS vehicle in rostral back of age-matched  $S1pr3^{+/+}$  (WT) and  $S1pr3^{-/-}$  (KO) mice;  $p = 0.0089$  (one-way ANOVA ( $F(3,9) = 7.274$ );  $N = 3-4$  mice per treatment). Tukey's multiple comparisons  $p$ -values are represented on graph for comparisons made between treated and vehicle groups. Error bars represent mean  $\pm$  SD.

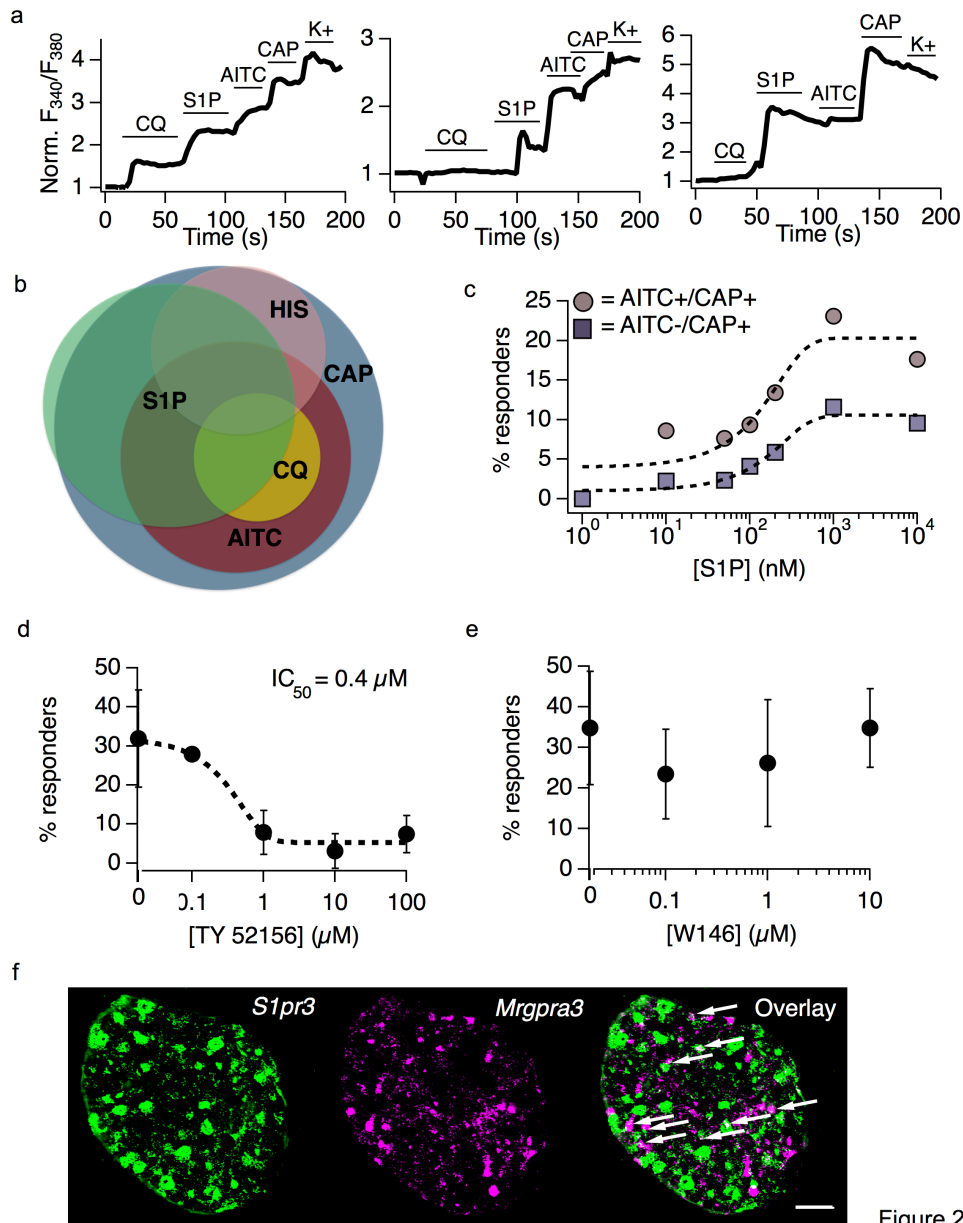

Figure 2

**Figure 2. S1PR3 is functional and expressed in a subset of pruriceptors.** **a.** Representative calcium imaging traces showing normalized Fura-2 signal (Norm.  $F_{340}/F_{380}$ ) over time before and after addition of indicated compounds in cultured DRG neurons (CQ = 1 mM chloroquine, S1P = 1  $\mu$ M S1P; AITC = 100  $\mu$ M allyl isothiocyanate; CAP = 1  $\mu$ M capsaicin; K+ = Ringer's with 75 mM potassium). (Left) Putative pruriceptor that responds to both chloroquine and S1P; (Center) putative pruriceptor or nociceptor which responds to both AITC and S1P; (Right) Putative thermal nociceptor which responds to S1P and capsaicin but not AITC. **b.** Venn diagram demonstrating overlap of neuronal subpopulations activated by capsaicin, AITC, histamine (HIS; 100  $\mu$ M) chloroquine, and S1P. Relative proportion of overlap represents % overlap as calculated from ratiometric calcium imaging data (N = 4,000 neurons). **c.** Dose-response curve showing proportion of DRG neurons responding to varying concentrations of S1P. Concentrations used: 1, 10, 50, 100, 200, 1000, and 10,000 nanomolar (N = 2 animals). Colored traces indicate proportion of neurons responding to S1P and AITC or S1P and capsaicin at indicated concentrations. **d.** S1P-evoked calcium transients in DRG neurons are inhibited by the selective S1PR3 antagonist TY 52156. Black dotted line indicated sigmoidal fit from which  $IC_{50}$  was derived (N = 2 animals). Error bars represent mean  $\pm$  SD. **e.** S1P-evoked calcium transients in DRG neurons are not inhibited by the selective S1PR1 antagonist W146 (N = 2 animals). Error bars represent mean  $\pm$  SD. **f.** Co-ISH of *S1pr3* (green) with *Mrgpra3* (magenta) in sectioned whole DRG from adult wild-type mice. Third column: overlay. Scale bar = 100  $\mu$ m. Images were acquired using a 10x air objective. Arrows indicate cells showing co-expression of both markers.

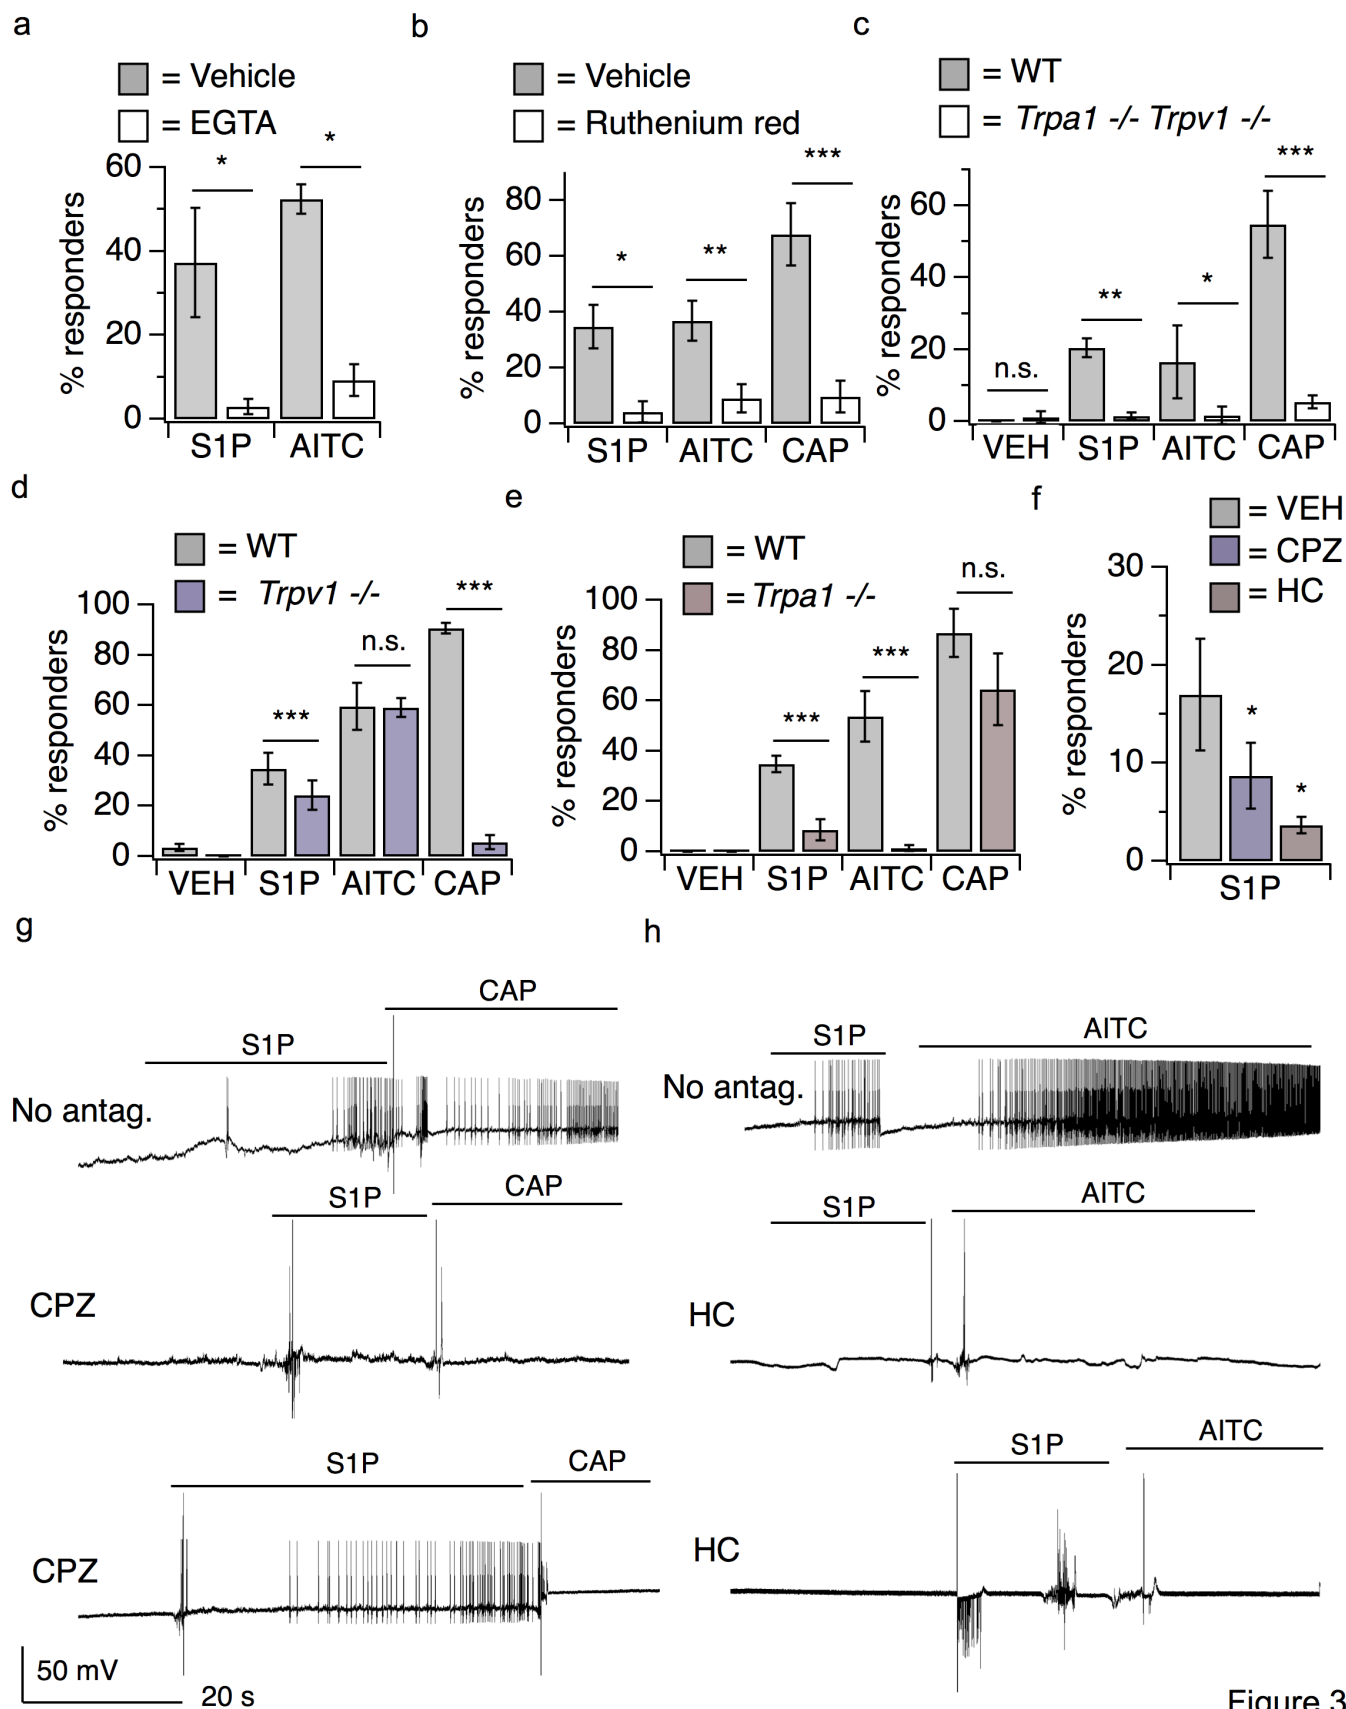

(Legend on following page)



**Figure 3. S1P triggers neuronal activation in distinct subsets of nociceptors and pruriceptors.** **a.** Percent DRG neurons responding to S1P and AITC in Calcium Ringer's and 10  $\mu$ M EGTA Ringer's;  $p < 0.0001$  (one-way ANOVA ( $F(3,11) = 8.291$ );  $N = 4$  wells of  $\sim 100$  neurons each per treatment). Error bars represent mean  $\pm$  SD. **b.** Percent responders to 1  $\mu$ M S1P, AITC, and Cap in vehicle and 10  $\mu$ M Ruthenium Red;  $p < 0.0001$  (one-way ANOVA ( $F(5,17) = 17.42$ );  $N = 5$  wells of  $\sim 100$  neurons each per treatment). Error bars represent mean  $\pm$  SD. **c.** Percent responders to vehicle, S1P, AITC, and capsaicin in *Trpa1/Trpv1*<sup>+/+</sup> and <sup>-/-</sup> DRG neurons;  $p < 0.0001$  (one-way ANOVA ( $F(7,40) = 8.555$ );  $N = 2$  age-matched mice per genotype) Error bars represent mean  $\pm$  SD. **d.** Percent responders to vehicle, S1P, AITC, and capsaicin in *Trpv1*<sup>+/+</sup> and *Trpv1*<sup>-/-</sup> neurons;  $p < 0.0001$  (one-way ANOVA ( $F(7, 179) = 72.67$ );  $N = 3$  age-matched mice per genotype). Error bars represent mean responses  $\pm$  SEM. **e.** Percent responders to vehicle, S1P, AITC, and capsaicin in *Trpa1*<sup>+/+</sup> and *Trpa1*<sup>-/-</sup> neurons;  $p < 0.0001$  (one-way ANOVA ( $F(7,210) = 105$ );  $N = 3$  age-matched mice per genotype). Error bars represent mean responses  $\pm$  SEM. **f.** Effect of 50  $\mu$ M Capsazepine (TRPV1 antagonist) and 50  $\mu$ M HC-030031 (TRPA1 antagonist) vs. DMSO-Ringer's vehicle on S1P-evoked calcium responses in cultured DRG neurons;  $p < 0.0001$  (one-way ANOVA ( $F(8,30) = 84.32$ );  $N = 3$  wells of  $\sim 100$  neurons each per treatment) Error bars represent mean responses  $\pm$  SD. Unless otherwise indicated, Sidak's multiple comparisons were made between treated and vehicle for each agonist. **g.** Whole cell current-clamp recordings of S1PR3+ DRG neurons from *S1pr3*<sup>mCherry/+</sup> animals pre-treated for 5-10 minutes with Vehicle (1% DMSO in Ringer's) or 50  $\mu$ M Capsazepine and subsequently exposed to 1  $\mu$ M S1P followed by 1  $\mu$ M capsaicin, indicated by lines. (Top) Recording from a neuron that responded to S1P and CAP; (Middle) A neuron that responded to neither S1P nor CAP; (Bottom) a neuron that responded to S1P but not CAP. In these experiments, 5 of 6 S1PR3+ cells which received vehicle responded to S1P and 5 of 6 responded to CAP; 3 of 8 cells which received Capsazepine responded to S1P and 0 of 8 cells responded to CAP ( $N = 3$  animals). **h.** Whole cell current-clamp recordings of S1PR3+ DRG neurons from *S1pr3*<sup>mCherry/+</sup> animals pre-treated for 5-10 minutes with Vehicle (1% DMSO in Ringer's) or 50  $\mu$ M HC-030031 and subsequently exposed to 1  $\mu$ M S1P followed by 100  $\mu$ M AITC, indicated by lines. (Top) Recording from a neuron that responded to S1P and AITC; (Middle) A neuron that responded to neither S1P nor AITC; (Bottom) a neuron that responded to S1P but not AITC. In these experiments, 4 of 5 S1PR3+ cells which received vehicle responded to S1P and 2 of 5 responded to AITC; 4 of 11 cells which received HC-030031 responded to S1P and 0 of 11 cells responded to AITC ( $N = 3$  animals).

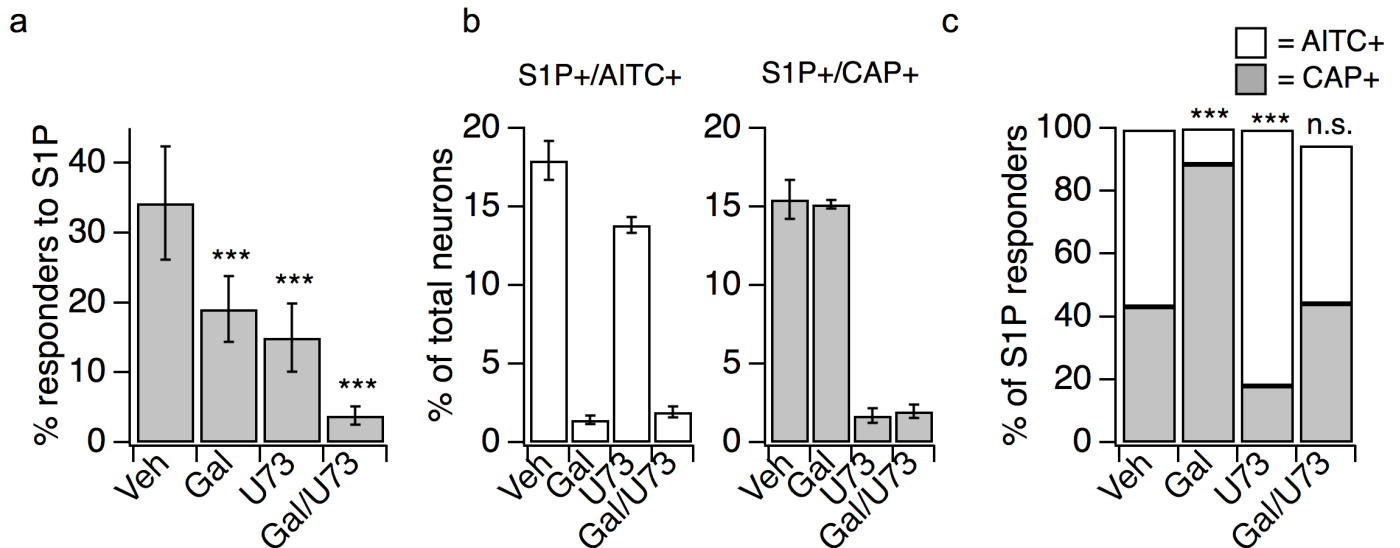

Figure 4

**Figure 4. S1PR3 utilizes distinct G-protein-coupled pathways to activate subsets of somatosensory neurons.**

**a.** Percent of DRG neurons responding to 1  $\mu$ M S1P after 15 minute incubation with either DMSO-Ringer's vehicle (Veh), 100  $\mu$ M Gallein (Gal; G $\beta$  blocker), 1  $\mu$ M U73122 (U73; PLC blocker), or U73122 + Gallein;  $p < 0.0001$  (one-way ANOVA ( $F(3,28) = 31.46$ );  $N = 4-10$  wells of  $\sim 50$  neurons each per treatment from 2 animals). Error bars represent mean responses  $\pm$  SD. Dunnett's multiple comparison  $p$ -values are indicated on graph for comparisons to vehicle. **b.** From experiments in **(a)**, percent of total neurons which were sensitive to S1P, AITC and capsaicin (white, left) or S1P and capsaicin only (grey, right); Error bars represent mean responses  $\pm$  SD. **c.** From experiments in **(a)**, percentage of S1P-responsive neurons that were sensitive to AITC and capsaicin (white) or capsaicin only (grey);  $p < 0.0001$  (one-way ANOVA ( $F(3,28) = 41.48$ )). Error bars are omitted for clarity, as they are represented in **(b)**, prior to normalization to percent of S1P-responsive neurons. Dunnett's multiple comparison  $p$ -values are indicated on graph for comparisons to vehicle.

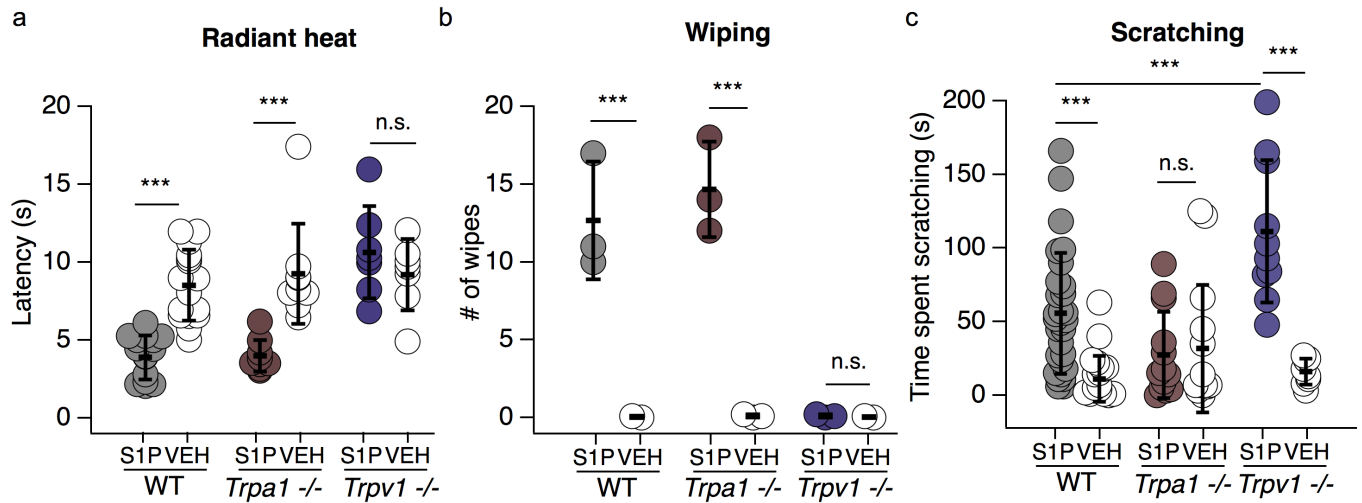

Figure 5

**Figure 5. S1P evokes itch and pain via distinct TRP channel-dependent pathways.** **a.** Radiant heat paw withdrawal latencies 20-30 minutes post injection of 15  $\mu$ L 10  $\mu$ M S1P or 0.3% methanol-PBS vehicle i.d. into the hind paw of age matched wild-type, *Trpa1*<sup>-/-</sup> and *Trpv1*<sup>-/-</sup> mice;  $p < 0.0001$  (one-way ANOVA ( $F(5,66) = 14.13$ );  $N = 7$  or more age-matched mice per condition). **b.** Number of wipes in response to intradermal (i.d.) injection of 20  $\mu$ L 10  $\mu$ M S1P or 0.3% methanol-PBS vehicle in cheek of age-matched wild-type, *Trpa1*<sup>-/-</sup> and *Trpv1*<sup>-/-</sup> mice;  $p < 0.0001$  (one-way ANOVA ( $F(5,11) = 33.98$ );  $N = 3$  age-matched mice per condition). **c.** Time spent scratching in response to intradermal injection of 20  $\mu$ L 0.2  $\mu$ M S1P or 0.1% methanol-PBS vehicle in rostral back of age-matched wild-type, *Trpa1*<sup>-/-</sup> and *Trpv1*<sup>-/-</sup> mice;  $p < 0.0001$  (one-way ANOVA ( $F(5,91) = 14.13$ );  $N = 8$  or more age-matched mice per condition). For all graphs, Sidak's multiple comparisons were made between all genotypes and treatments and error bars represent mean  $\pm$  SD.

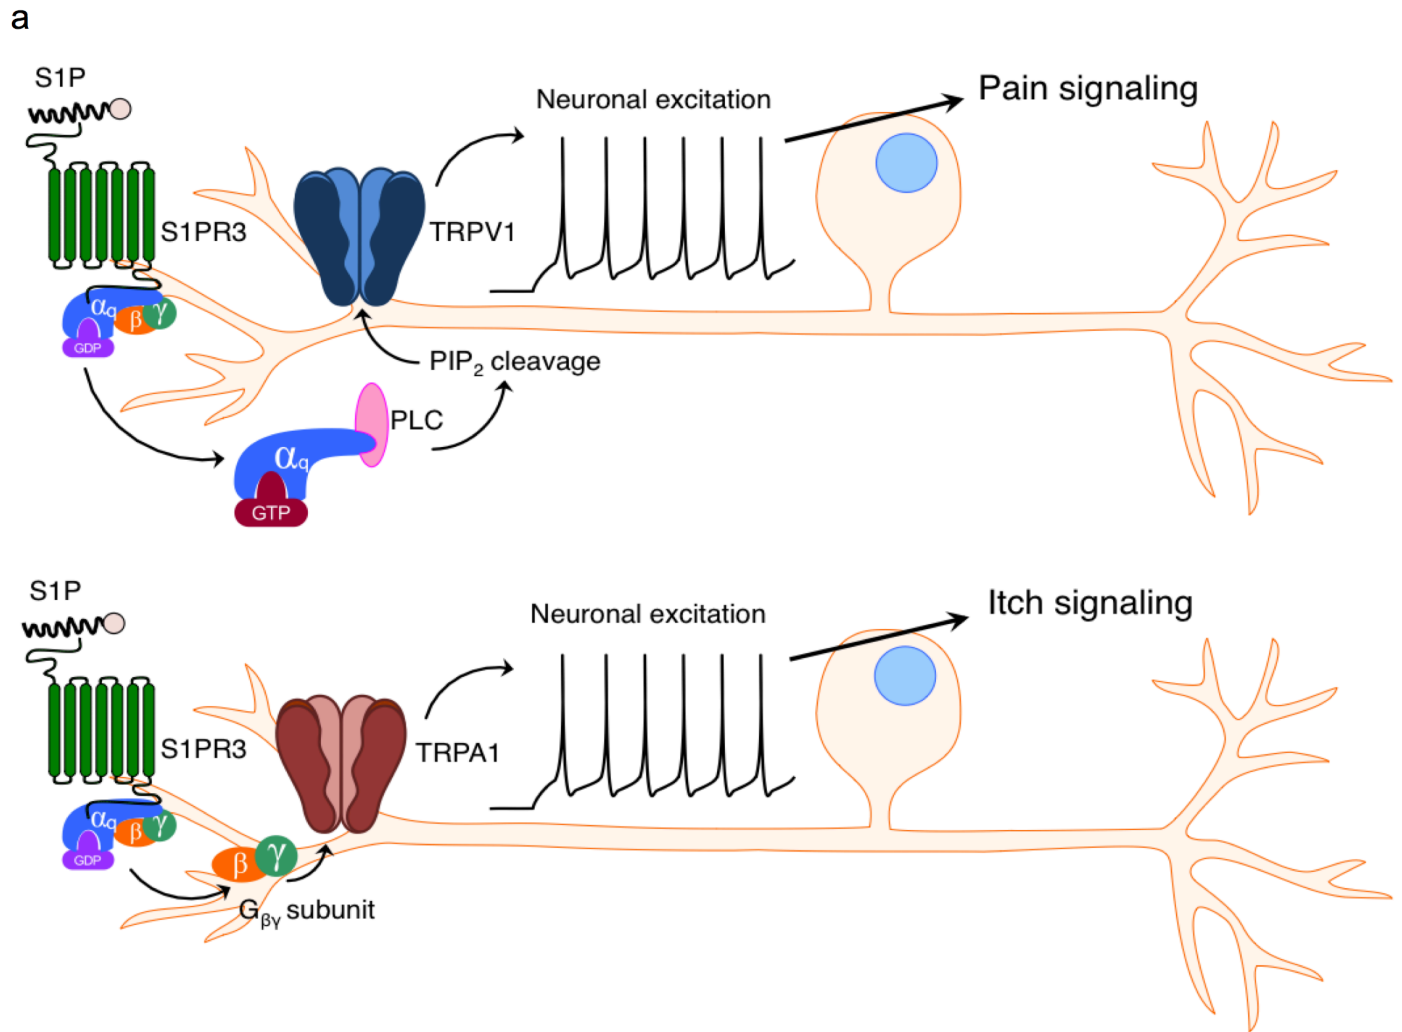

Figure 6

**Figure 6. The effects of S1P on thermal hypersensitivity and acute pain and itch. a.** Elevated S1P 1) elicits thermal hypersensitivity and acute pain via S1PR3-dependent activation of TRPV1, which requires PLC activity (top) and 2) elicits itch-evoked scratching via S1PR3-dependent activation of TRPA1, which requires G<sub>βγ</sub> (bottom).
